# Supplementary material for: Assessing the impact of adjusting for maturity in weight status classification in a cross-sectional sample of UK children
Source: PubMed Central journal article supplement — BMJ Open. 2017 Jun 26;7(6):e015769. doi: 10.1136/bmjopen-2016-015769 (PMC5541588; doi:10.1136/bmjopen-2016-015769), 2017-06-26
Supplement: bmjopen-2016-015769.draft_revisions.pdf [file bmjopen-2016-015769.draft_revisions.pdf]

# BMJ Open

## Assessing the impact of adjusting for maturity in children's weight status classification in a cohort of UK children

|                                    |                                                                                                                                                                                                                                                                                                                                             |
|------------------------------------|---------------------------------------------------------------------------------------------------------------------------------------------------------------------------------------------------------------------------------------------------------------------------------------------------------------------------------------------|
| Journal:                           | <i>BMJ Open</i>                                                                                                                                                                                                                                                                                                                             |
| Manuscript ID                      | bmjopen-2016-015769                                                                                                                                                                                                                                                                                                                         |
| Article Type:                      | Research                                                                                                                                                                                                                                                                                                                                    |
| Date Submitted by the Author:      | 14-Jan-2017                                                                                                                                                                                                                                                                                                                                 |
| Complete List of Authors:          | Gillison, Fiona; University of Bath, Department for Health<br>Cumming, Sean; University of Bath, Department for Health<br>Standage, Martyn; University of Bath, Department for Health<br>Barnaby, Catharine; University of Bath, Bath Institute for Mathematical<br>Innovation<br>Katzmarzyk, Peter; Pennington Biomedical Research Center, |
| <b>Primary Subject<br>Heading</b>: | Paediatrics                                                                                                                                                                                                                                                                                                                                 |
| Secondary Subject Heading:         | Epidemiology, Public health, Health policy                                                                                                                                                                                                                                                                                                  |
| Keywords:                          | childhood obesity, adolescent obesity, weight status, health promotion,<br>maturity, weight measurement                                                                                                                                                                                                                                     |
|                                    |                                                                                                                                                                                                                                                                                                                                             |

SCHOLARONE™  
Manuscripts

1  
2  
3 Assessing the impact of adjusting for maturity in children's weight  
4 status classification in a cohort of UK children  
5  
6  
7  
8  
9

10 Fiona Gillison, Sean Cumming, Martyn Standage, Catherine Barnaby, Peter Katzmarzyk  
11

12  
13 Corresponding author: Fiona Gillison, Senior Lecturer  
14

15 Department for Health, University of Bath, Bath, BA2 7AY, UK  
16

17 [f.b.gillison@bath.ac.uk](mailto:f.b.gillison@bath.ac.uk), 01225 384387  
18  
19

20 Sean Cumming, Senior Lecturer  
21

22 Department for Health, University of Bath, Bath, BA2 7AY, UK  
23  
24

25 Martyn Standage, Professor  
26

27 Department for Health, University of Bath, Bath, BA2 7AY, UK  
28  
29

30 Catherine Barnaby, Commercial Research Associate  
31

32 Department for Health, University of Bath, Bath, BA2 7AY, UK  
33  
34  
35  
36  
37

38 Peter Katzmarzyk, Professor  
39

40 Pennington Biomedical Research Centre, 6400 Perkins Road, Baton Rouge, LA 70808, USA  
41  
42  
43  
44

45 Word count: 2695  
46  
47

48 Keywords: **childhood obesity, weight status, maturity, weight measurement**  
49  
50  
51  
52  
53  
54  
55  
56  
57  
58  
59  
60

## ABSTRACT

**Objectives** To compare the weight categorisation of a cohort of UK children using standard procedures (i.e., comparing BMI percentiles to age-matched UK reference data) versus an approach adjusted for maturation status (i.e., matching relative to biological age).

**Design** Analysis of data collected from an observational study of UK primary school children.

**Setting** Schools in south west England.

**Participants** Four hundred and seven 9-11 year old children (Mean age 10.88 years, SD=0.46, range 9-11; 98% white British)

**Main outcome measures:** Weight status was classified using BMI percentiles using (i) sex and chronological-age matched referents, and (ii) sex and biological-age matched referents (based on % of predicted adult stature) relative to UK 1990 reference growth charts. Using both approaches, children were classified as a normal weight if  $>2^{\text{nd}}$  percentile and  $<85^{\text{th}}$  percentile, overweight if  $85^{\text{th}}$  and  $<95^{\text{th}}$  percentiles, and obese if  $\geq 95^{\text{th}}$  percentile.

**Results** Fifty-one children (12.5%) were overweight, and a further 51 obese (12.5%) according to standard chronological-age matched classifications. Adjustment for maturity resulted in 32% of overweight girls, and 15% of overweight boys being reclassified as a normal weight, and 11% and 8% of obese girls and boys respectively being reclassified as overweight. Early maturing children were 4.9 times more likely to be reclassified from overweight to normal weight than 'on-time' maturers (odds ratio 95% CI=1.3 to 19.0).

**Conclusions:** Incorporating assessments of maturational status into weight classification resulted in significant changes to the classification of early-maturing adolescents. Further work to explore the implications for objective health risk is needed.

**ARTICLE SUMMARY****Strengths and Limitations of this study**

- The analyses are based on objective height and weight measurements of 407 children taken by trained researchers implementing a rigorous protocol.
- The approach is the first to demonstrate a simple, readily replicable means of exploring or adjusting for the impact of maturity timing on weight categorisation during adolescence.
- While the sample was representative of the diversity of children in one geographical area of the UK, the data are not nationally representative and ethnic minority groups are particularly under-represented.

## INTRODUCTION

As a means of identifying children at elevated risk of poor health and wellbeing, the classification of children's weight status is widely practiced by physicians and public health teams in many countries.[1-3] Yet, parents' recognition of when a child is overweight can be as low as 25%.[4] This is in part exacerbated by the normalisation of overweight now that approximately 33% of UK 10-11 year olds are overweight or obese. Schemes such as England's National Child Measurement Programme (NCMP), through which over 95% of 4-5 and 10-11 year old children are weighed each year,[5] provide excellent data for monitoring population-level obesity. However, the NCMP has also been used to provide objective feedback to parents on their child's weight status with a view to improving awareness and engaging families with weight management services. To date however, providing NCMP data as feedback has resulted in little uptake of weight management support,[6] and may have alienated many parents who are angry and/or disbelieving of the information provided.[6-8]

Research investigating the source of parental anger and rejection of the weighing and measuring of children highlights that many parents fear that the risk of harm to their child's health and wellbeing is greater from *labelling* them as overweight (e.g., in undermining self-esteem and triggering eating disorder symptomology and poor self-esteem) than it is from *being* overweight.[6-10] In the absence of conclusive evidence that this is not the case, and given that strong negative associations between parent-child weight talk and well-being have been reported,[11] health professionals have a responsibility to ensure that any intervention that could incur such risks is based on accurate information and does not target those for whom it may not be necessary.

A primary reason that parents offer for being distrustful of the information provided about their child's weight status is that such judgements fail to account for individual differences. In particular, parents argue that when children approach puberty, judgements of their weight status that do not take account of relative differences in pubertal development

1  
2  
3 are not valid<sup>7</sup>. The use of BMI for establishing weight status in relation to health risk in  
4 children is certainly problematic, especially during the period of peak growth velocity  
5 (average onset 11.8 in girls, and 14 in boys)[12] when height (and therefore the height to  
6 weight ratio on which the BMI is based) is liable to considerable change. Past work using  
7 Dual Energy X-ray Absorption scans to provide accurate assessments of body fat  
8 demonstrate a considerable normative increase in fat mass around the trunk in both boys  
9 and girls in the lead up to the period of peak height velocity (i.e., the main event referred to  
10 as 'puberty') regardless of physical activity and dietary fat intake.[13,14] Yet, these studies  
11 have not used data to adjust estimates of a child's weight status according to their maturity  
12 status.  
13  
14  
15  
16  
17  
18  
19  
20  
21  
22  
23

24 There is currently no research reporting on whether adjustment for pubertal status  
25 would result in different classification of risk for children who are advanced in maturity.  
26 Despite this lack of work, it would be readily possible to do so within a practice setting via  
27 using non-invasive means of estimating children's maturity status that are currently  
28 available. Accordingly, the aim of this study is to investigate the degree to which the weight  
29 categorisation of a cohort of UK 9-11 year old children differs when estimated through  
30 comparison of their BMI against chronological age- and sex-matched UK BMI reference  
31 charts (standard UK practice), versus when estimated using reference charts matched to  
32 their biological (i.e., maturity adjusted) age. This analysis is undertaken with a view to  
33 providing a means of adjusting for expected maturity-related increases in body fat mass  
34 among children and adolescents to provide more accurate estimates of obesity prevalence.  
35  
36  
37  
38  
39  
40  
41  
42  
43  
44  
45  
46  
47  
48  
49  
50  
51  
52  
53  
54  
55  
56  
57  
58  
59  
60

The process of generating more tailored estimates of weight status may also help to engage  
parents in discussions about a healthy weight for their child and has the potential to increase  
acceptance that a child is overweight.

## METHODS

### Participants

Participants were 407 9-11 year old children who formed the UK sample of the International Study of Childhood Obesity, Lifestyle and the Environment (ISCOLE).[15] Participants were recruited from 26 primary schools in south west England. Schools were stratified according to student socio-economic status (SES; based on levels of entitlement to free school meals; high, mid, low) of the catchment area and weighted by size (large, small), and then approached sequentially to maximise the diversity of the sample of participating children. All year 6 children in participating schools were eligible to take part.

### Procedure

Detailed information of the standardised data collection protocol is published elsewhere<sup>15</sup>. Written consent for the study was obtained from head teachers and parents, and assent provided by children prior to participation. A battery of anthropometric measurements were taken by staff trained in the ISCOLE protocol. Standing height was measured to the nearest 0.1 cm without shoes with the participant's head in the Frankfort Plane and at the end of a deep inhalation using a Seca 213 portable stadiometer (Hamburg, Germany). Body mass was measured to the nearest 0.1 kg using a portable Tanita SC- 240 Body Composition Analyzer (Arlington Heights, IL). Subsequently, Body Mass Index (BMI; body mass (kg)/height (m<sup>2</sup>)) was calculated. Overarching ethical approval for the ISCOLE protocol was provided by the Pennington Biomedical Research Center Institutional Review Board, and local ethical approval was also obtained for the UK site by the institutional research ethics committee. Data were entered into a secure central web-based management system, audited by the ISCOLE coordinating centre.

Classification of maturity and weight status. Maturity status was calculated by a non-invasive means (i.e., the Kamis-Roche method),[16] based on the percentage of predicted adult stature that a child had attained at measurement. This method holds that among youth of the same age, individuals who are closer to their mature (i.e., adult) stature are more

1  
2  
3 advanced in biological maturity. A boy of 12 years who has attained 90% of predicted adult  
4 height, for example, would be considered more mature than a boy, of the same age and  
5 height, who had obtained 80% predicted adult height. The Khamis-Roche method predicts  
6 adult height from the child's age, height, and weight, and mid-height of the biological  
7 parents. Self-reported parent heights were adjusted for over-estimation using equations  
8 generated from over 1000 measured and self-estimated heights from adults.[17] The  
9 Khamis-Roche method has been validated against skeletal age in American youth[18] and  
10 has also been applied in studies of British youth.[19-21] The median error bounds between  
11 actual and predicted adult stature between the ages of 9 to 12 fall between 2.0 and 2.5 cm in  
12 boys, and 1.9 and 2.1 cm in girls, respectively.[16]

23  
24 Maturity status was calculated using z-scores for the percentage of mature height  
25 achieved: for group comparisons, z-scores between -1.0 and + 1.0 were considered 'on  
26 time', z-scores below -1.0 'late maturers', and z-scores above 1.0, 'early maturers'. [22] To  
27 obtain an estimate of biological age, percentage of adult stature was compared with age and  
28 sex specific reference standards generated from the UK 1990 growth reference data.[23]  
29 Reference standards for percentage of adult stature attained were calculated at intervals of  
30 0.1 years for each sex. Percentages were based upon mean values for stature attained at  
31 each age interval, and the mean values for stature attained at and above 18 years of age  
32 (177.6 cm in males; 163.7 cm in females). For example, a girl of 10.5 years who had  
33 attained 91.5% of predicted adult stature would have presented a value equivalent to the  
34 mean percentage of adult stature attained by UK girls aged 12.0 years. Accordingly, she  
35 would be assigned a maturational (biological) age of 12.0 years. For both standard and  
36 adjusted calculations of weight status, and in line with UK clinical practice, overweight and  
37 obesity was judged through reference to the UK1990 BMI reference data.[24] Children with a  
38 BMI  $\geq$  the 85<sup>th</sup> percentile and  $<$ 95<sup>th</sup> percentile were classified as overweight, and children  
39 over the 95<sup>th</sup> percentile as obese. The difference between the two classification systems  
40 (i.e., standard, and maturity adjusted) stemmed from the reference curve against which the  
41  
42  
43  
44  
45  
46  
47  
48  
49  
50  
51  
52  
53  
54  
55  
56  
57  
58  
59  
60



1  
2  
3 child's BMI was compared. To calculate standard classifications, children were matched to  
4  
5 the reference curve appropriate to their sex and chronological age in months. Each child's  
6  
7 predicted adult stature was used to calculate maturity-adjusted classifications, providing an  
8  
9 estimate of their biological age (i.e., that is the age at which they would be expected to  
10  
11 achieve their current % adult stature according to UK reference growth charts). The child's  
12  
13 BMI was then judged against the 85<sup>th</sup> and 95<sup>th</sup> percentiles for their biological age in line with  
14  
15 the threshold used for population assessment using NCMP data by Public Health England  
16  
17 (PHE) in 2016.[25]  
18

### 19 20 **Analysis**

21  
22 We examined whether the classification of weight differed significantly when using standard  
23  
24 versus adjusted BMI percentiles using chi-square tests, and explored whether there were  
25  
26 differences in the number of children reclassified according to sex or maturity status using  
27  
28 ANOVA. Odds ratios of the probability of change in classification were calculated for early,  
29  
30 on-time, and late maturers.  
31

### 32 33 **RESULTS**

34  
35 The sample comprised 407 children (78% of the 525 involved in the study; 223 girls (55%),  
36  
37 Mean age 10.88 years, SD=0.46, range 9.3 -11.8) whose height and weight were objectively  
38  
39 measured and whose biological parents self-reported their own heights. Average BMI was  
40  
41 18.34 (SD=2.95), and according to usual age and sex matched cut-offs, 51 (12.5%) children  
42  
43 were classified as overweight, and a further 51 (12.5%) obese. Slightly more girls than boys  
44  
45 were overweight or obese (26% versus 24%, respectively). No children were underweight  
46  
47 (BMI < 2<sup>nd</sup> percentile). As expected, girls had reached a more advanced stage of maturity on  
48  
49 average than boys (girls averaged 88% expected adult height, vs 81% for boys). Five  
50  
51 percent of boys and 9% of girls were late maturers, 71% of boys and 61% of girls on-time,  
52  
53 and 24% of boys and 30% of girls were early maturers.  
54  
55  
56  
57  
58  
59  
60

1  
2  
3 The results of a 2-way (gender and weight status) ANOVA indicated that children were  
4 significantly more likely to be classified as overweight or obese if they were biologically more  
5 mature ( $F(5, 401)=150.75, p<.001; \eta^2$  for maturity status=0.16). This was the case for both  
6 boys and girls ( $\eta^2$  for sex=0.65), although it was more pronounced in girls (interaction term;  
7  $F(2,401)=5.47, p=0.005; \eta^2=0.03$ ) (Figure 1).  
8  
9  
10  
11  
12

13  
14 Figure 1: Trends in maturation status across weight categorisation

15 <Figure 1 here>  
16  
17

### 18 **Comparisons with adjusted values**

19  
20 For the sample as a whole, the mean difference between chronological age and biological  
21 age (i.e., age for the given percentage of expected adult height achieved) was 0.18 years  
22 (SD = 0.46), ranging from a delay of 1.67 years, to being advanced by 5.5 years. This latter  
23 value relates to a girl with a height of 166.35 cm, who had reached 99.9% of her predicted  
24 adult height; her weight status did not change when adjusting for developmental stage (she  
25 was classified as obese using both systems).  
26  
27  
28  
29  
30  
31

32 When BMI percentile was adjusted for maturation, there was a small decrease in the  
33 proportion of children classified as overweight (from 12.5 to 10.6%), and obese (from 12.5%  
34 to 11.8%). This related to a small but significant decrease in the mean estimated BMI  
35 percentile within the sample; standard vs adjusted calculation Mean BMI = 58.15 (SD=30.06)  
36 vs 57.42 (SD=28.78) ( $t(406)=3.09, p=.002; d=0.02$ ). Overall, 5 (11%) overweight or obese  
37 boys, and 13 (22%) of overweight or obese girls were reclassified into a lower weight  
38 category (Chi square = 582.72,  $p<0.001$ , Table 1). Only one boy and three girls were  
39 reclassified into a higher weight category.  
40  
41  
42  
43  
44  
45  
46  
47

48 Of the 111 children judged to be early maturers, 59% were classified as a healthy  
49 weight using standard chronological age growth reference charts (19% overweight, and 23%  
50 obese), compared with 67% following adjustment for maturity (13% overweight and 21%  
51 obese). Overweight early maturers (i.e., those we consider most important to 'get right' on  
52 the basis of requiring intervention or not) were 4.9 times more likely to be reclassified as a  
53  
54  
55  
56  
57  
58  
59  
60

normal weight following maturity adjustment than their overweight on-time peers (43% vs 13%; odds ratio = 4.85; 95% CI 1.25 to 19.03). There was no apparent difference for obese children reclassified as overweight (8% vs 12%; odds ratio = 0.67, 95% CI 0.10 to 4.37).

Table 1: Comparison of weight classifications following BMI percentile adjustment

| Standard percentiles | Adjusted percentiles                |                    |               | Total N |
|----------------------|-------------------------------------|--------------------|---------------|---------|
|                      | Healthy weight<br>n(%)              | Overweight<br>n(%) | Obese<br>n(%) |         |
| Boys                 | Chi-square (df=4) = 298.6, p<0.001  |                    |               |         |
| Healthy weight       | 139 (>99)                           | 1 (<1)             | 0             | 142     |
| Overweight           | 3 (15)                              | 17 (85)            | 0             | 20      |
| Obese                | 0                                   | 2(8)               | 22 (92)       | 24      |
| Girls                | Chi-square (df=4) = 290.32, p<0.001 |                    |               |         |
| Healthy weight       | 164 (>99)                           | 1 (<1)             | 0             | 165     |
| Overweight           | 10 (32)                             | 19 (61)            | 2 (7)         | 31      |
| Obese                | 0                                   | 3 (11)             | 24 (89)       | 27      |

## DISCUSSION

A comparison of the weight status categorisation of a sample of 9-11 year old UK children according to standard chronological age versus biological age growth charts resulted in the downward-classification of 18% of overweight and obese children, representing 22% of overweight girls and 11% of overweight boys. Only four children (1%) were reclassified into a higher weight category. This effect was more pronounced in girls, for whom almost one in three girls who were reported to be overweight would not have been classified as such using a maturity-adjusted approach. Given the limited age range of the sample, and that boys

1  
2  
3 mature on average two years later than girls, the effect may reach a similar extent for boys  
4  
5 but at a later age.  
6

7  
8 This is the first study to quantify the difference that adjusting judgements of weight  
9  
10 status by a child's level of maturity could have on both population estimates of childhood  
11  
12 overweight and obesity, and on the treatment of individual children and families. Its strengths  
13  
14 lie in basing the analysis on a broad cohort of children using robust objective measurement  
15  
16 protocols at an age when the effects of puberty are first starting to emerge, and importantly  
17  
18 at the age when weight measurement by health professionals takes place and the lack of  
19  
20 consideration for maturity is known to be a source of tension between parents and health  
21  
22 services. A limitation of the study is that the original UK 1990 dataset bases the norms on  
23  
24 which the BMI percentiles that we (and health services) use include children of all maturity  
25  
26 levels, not only on-time maturers. However, it is likely that the differences observed in our  
27  
28 analyses would have been greater, rather than smaller, if the reference data had also  
29  
30 standardised for maturity status (i.e., if off-time maturers could be removed).  
31

32  
33 BMI is acknowledged to be a useful but imperfect proxy indicator of fat mass (and  
34  
35 excess fat mass) and subsequent health risk.[26-28] While past work has explored how  
36  
37 moderating factors such as sex, race and ethnicity[29,30] may influence the accuracy of BMI  
38  
39 in predicting health risk, we are not aware of any research that has explored the effects of  
40  
41 biological maturity in children and adolescents. The analyses presented here illustrate the  
42  
43 difference in weight classification that would result from accounting for children's maturity  
44  
45 status in addition to age and sex in benchmarking BMI against growth reference charts for  
46  
47 the first time. As the healthy range for BMI increases with age up to adulthood as a reflection  
48  
49 of expected healthy increases in body fat during puberty, it is likely that early maturing  
50  
51 adolescents can be a normal or healthy weight at a higher BMI than their later maturing  
52  
53 peers: however, research specifically mapping maturity-adjusted weight categorisation to  
54  
55 health risk is needed to formally test this hypothesis.  
56  
57  
58  
59  
60

1  
2  
3 These findings post two key implications for practice: First, they raise the question of  
4 whether we should adjust for maturity when judging whether children or adolescents are  
5 overweight. Given the lack of evidence that weight monitoring (as undertaken through the  
6 NCMP and similar programmes) results in positive effects on children's health and health  
7 behaviours,[6,31] and some evidence that such monitoring activities could undermine their  
8 wellbeing and self-concept,[7,8] there seems little risk that doing so will result in harm  
9 (children not identified, and not receiving help). Whereas the practice could be of benefit if by  
10 tailoring for maturity in line with parent requests, we are better able to raise awareness and  
11 engage with parents whose children remain classified as overweight or obese following  
12 adjustment. Second, the findings suggest that early maturing children are particularly at risk  
13 of misclassification; this group are already known to be at greater risk of poor mental  
14 health[32-34] and may be particularly susceptible to the negative impact of such evaluations  
15 as they generally hold more negative perceptions of the physical self (lower perceptions of  
16 attractiveness, sports competence, and fitness.[35] As such, early maturing adolescents  
17 represent a vulnerable group with whom we should be particularly careful to minimise the  
18 potential unintended negative consequences of health policies.  
19  
20  
21  
22  
23  
24  
25  
26  
27  
28  
29  
30  
31  
32  
33  
34  
35  
36  
37  
38  
39  
40  
41  
42  
43  
44  
45  
46  
47  
48  
49  
50  
51  
52  
53  
54  
55  
56  
57  
58  
59  
60

**REFERENCES**

1. NHS Digital. National Child Measurement Programme [cited 2016 Dec 15] Available from: <http://content.digital.nhs.uk/NCMP>
2. Wieske RC, Nijhuis MG, Carmiggelt BC, Wagenaar-Fischer MM, Boere-Boonekamp MM. Preventive youth health care in 11 European countries: an exploratory analysis. *International journal of public health*. 2012;57(3):637-41.
3. Roberto C, Soo J, Pomeranz L. Regulatory strategies for preventing obesity and improving public health. *Managing and Preventing Obesity: Behavioural Factors and Dietary Interventions*. 2014:277.
4. Tompkins CL, Seablom M, Brock DW. Parental Perception of Child's Body Weight: A Systematic Review. *Journal of Child and Family Studies*. 2015;24(5):1384-91.
5. NHS Digital. National Child Measurement Programme: England, 2015/16 school year Data Quality Statement. 2016 Nov 3 [cited 2016 Dec 15] Available from: <http://content.digital.nhs.uk/catalogue/PUB22269/nati-chil-meas-prog-eng-2015-2016-qual.pdf>
6. Falconer CL, Park MH, Coker H, Skow A, Black J, Saxena S, et al. The benefits and harms of providing parents with weight feedback as part of the national child measurement programme: a prospective cohort study. *BMC Public Health*. 2014;14:549.
7. Gillison F, Beck F, Lewitt J. Exploring the basis for parents' negative reactions to being informed that their child is overweight. *Public Health Nutr*. 2014;17(5):987-97.
8. Grimmett C, Croker H, Carnell S, Wardle J. Telling parents their child's weight status: psychological impact of a weight-screening program. *Pediatrics*. 2008;122(3):e682-8.
9. Syrad H, Falconer C, Cooke L, Saxena S, Kessel A, Viner R, et al. 'Health and happiness is more important than weight': a qualitative investigation of the views of parents receiving written feedback on their child's weight as part of the National Child Measurement Programme. *Journal of Human Nutrition and Dietetics*. 2014

10. Borra ST, Kelly L, Shirreffs MB, Neville K, Geiger CJ. Developing health messages: qualitative studies with children, parents, and teachers help identify communications opportunities for healthful lifestyles and the prevention of obesity. *Journal of the American Dietetic Association*. 2003;103(6):721-8.
11. Gillison F, Lorenc A, Sleddens E, Williams S, Atkinson L. Can it be harmful for parents to talk to their child about their weight? A meta-analysis. *Preventive Medicine*. 2016; 93:135-46
12. Malina RM, Bouchard C, Bar-Or O. Growth, maturation, and physical activity. *Human Kinetics*; 2004.
13. Sherar LB, Esliger DW, Baxter-Jones AD, Tremblay MS. Age and gender differences in youth physical activity: does physical maturity matter? *Medicine and science in sports and exercise*. 2007;39(5):830.
14. Sherar LB, Eisenmann JC, Chilibeck PD, Muhajarine N, Martin S, Bailey DA, et al. Relationship between trajectories of trunk fat mass development in adolescence and cardiometabolic risk in young adulthood. *Obesity*. 2011;19(8):1699-706.
15. Katzmarzyk PT, Barreira TV, Broyles ST, Champagne CM, Chaput JP, Fogelholm M, et al. The International Study of Childhood Obesity, Lifestyle and the Environment (ISCOLE): design and methods. *BMC Public Health*. 2013;13:900.
16. Khamis HJ, Roche AF. Predicting adult stature without using skeletal age: the Khamis-Roche method. *Pediatrics*. 1994;94(4):504-7..
17. Epstein LH, Valoski AM, Kalarchian MA, McCurley J. Do children lose and maintain weight easier than adults: a comparison of child and parent weight changes from six months to ten years. *Obesity research*. 1995;3(5):411-7.
18. Malina RM, Dompier TP, Powell JW, Barron MJ, Moore MT. Validation of a noninvasive maturity estimate relative to skeletal age in youth football players. *Clinical Journal of Sport Medicine*. 2007;17(5):362-8.

- 1  
2  
3 19. Cumming SP, Standage M, Gillison F, Malina RM. Sex differences in exercise behavior  
4 during adolescence: is biological maturation a confounding factor? *J Adolesc Health*.  
5 2008;42(5):480-5.  
6  
7
- 8  
9 20. Cumming SP, Standage M, Loney T, Gammon C, Neville H, Sherar LB, et al. The  
10 mediating role of physical self-concept on relations between biological maturity status  
11 and physical activity in adolescent females. *Journal of adolescence*. 2011;34(3):465-73.  
12  
13
- 14 21. Hunter Smart JE, Cumming SP, Sherar LB, Standage M, Neville H, Malina RM. Maturity  
15 associated variance in physical activity and health-related quality of life in adolescent  
16 females. A mediated effects model. *Journal of physical activity & health*. 2012;9(1):86-  
17 95.  
18  
19
- 20 22. Malina RM, Cumming SP, Morano PJ, Barron M, Miller SJ. Maturity status of youth  
21 football players: a noninvasive estimate. *Med Sci Sports Exerc*. 2005;37(6):1044-52.  
22  
23
- 24 23. Freeman J, Cole T, Chinn S, Jones P, White E, Preece M. Cross sectional stature and  
25 weight reference curves for the UK, 1990. *Archives of disease in childhood*.  
26 1995;73(1):17-24.  
27  
28
- 29 24. Cole TJ, Freeman JV, Preece MA. Body mass index reference curves for the UK, 1990.  
30 *Archives of disease in childhood*. 1995;73(1):25-9.  
31  
32
- 33 25. Public Health England [internet] 2016. Measuring and interpreting BMI in Children [cited  
34 2016 Dec 15]. Available from:  
35 [http://www.noo.org.uk/NOO\\_about\\_obesity/measurement/children](http://www.noo.org.uk/NOO_about_obesity/measurement/children)  
36  
37
- 38 26. Freedman DS, Mei Z, Srinivasan SR, Berenson GS, Dietz WH. Cardiovascular risk  
39 factors and excess adiposity among overweight children and adolescents: the Bogalusa  
40 Heart Study. *The Journal of pediatrics*. 2007;150(1):12-7. e2.  
41  
42
- 43 27. Freedman DS, Sherry B. The validity of BMI as an indicator of body fatness and risk  
44 among children. *Pediatrics*. 2009;124(Supplement 1):S23-S34.  
45  
46
- 47 28. Mei Z, Grummer-Strawn LM, Pietrobelli A, Goulding A, Goran MI, Dietz WH. Validity of  
48 body mass index compared with other body-composition screening indexes for the  
49  
50  
51  
52  
53  
54  
55  
56  
57  
58  
59  
60



- 1  
2  
3 assessment of body fatness in children and adolescents. *The American journal of*  
4 *clinical nutrition*. 2002;75(6):978-85.  
5  
6  
7 29. Duncan JS, Duncan EK, Schofield G. Accuracy of body mass index (BMI) thresholds for  
8 predicting excess body fat in girls from five ethnicities. *Asia Pacific Journal of Clinical*  
9 *Nutrition*. 2009;18(3):404-11.  
10  
11  
12 30. Zimmermann MB, Gubeli C, Puntener C, Molinari L. Detection of overweight and obesity  
13 in a national sample of 6-12-y-old Swiss children: accuracy and validity of reference  
14 values for body mass index from the US Centers for Disease Control and Prevention  
15 and the International Obesity Task Force. *The American journal of clinical nutrition*.  
16 2004;79(5):838-43.  
17  
18  
19 31. Nihiser AJ, Lee SM, Wechsler H, McKenna M, Odom E, Reinold C, et al. BMI  
20 measurement in schools. *Pediatrics*. 2009;124(Supplement 1):S89-S97.  
21  
22  
23 32. Niven A, Fawkner S, Knowles A-M, Stephenson C. Maturation differences in physical  
24 self-perceptions and the relationship with physical activity in early adolescent girls.  
25 *Pediatric Exercise Science*. 2007;19(4):472-80.  
26  
27  
28 33. Kaltiala-Heino R, Marttunen M, Rantanen P, Rimpelä M. Early puberty is associated  
29 with mental health problems in middle adolescence. *Social science & medicine*.  
30 2003;57(6):1055-64.  
31  
32  
33 34. Laitinen-Krispijn S, Ende J, Hazebroek-Kampschreur A, Verhulst F. Pubertal maturation  
34 and the development of behavioural and emotional problems in early adolescence. *Acta*  
35 *Psychiatrica Scandinavica*. 1999;99(1):16-25.  
36  
37  
38 35. Cumming SP, Sherar LB, Smart JEH, Rodrigues AM, Standage M, Gillison FB, et al.  
39 Physical activity, physical self-concept, and health-related quality of life of extreme early  
40 and late maturing adolescent girls. *The Journal of Early Adolescence*. 2012;32(2):269-  
41 92.  
42  
43  
44  
45  
46  
47  
48  
49  
50  
51  
52  
53  
54  
55  
56  
57  
58  
59  
60

1  
2  
3 Competing interests:

4 None to declare  
5  
6  
7

8 Funding

9  
10 The ISCOLE study on which this paper is based was funded by The Coca-Cola Company.  
11 All authors except for CB were recipients of this grant. The funder had no role in study  
12 design, data collection and analysis, decision to publish, or preparation of the manuscript. All  
13 researchers were independent of the funders in all aspects of their research.  
14

15 Details of contributors

16  
17  
18 Fiona Gillison led in the drafting of the paper, development of the idea for the use of the  
19 ISCOLE data in this way (with SC), conduct of analyses (with CB). She was a CI for the UK  
20 ISCOLE site, involved with data collection, researcher training and quality oversight.  
21

22 Sean Cumming provided expertise in the assessment of maturity and interpretation of  
23 findings, contributed to the development of the concept for using the ISCOLE data in this  
24 way (with FG), and contributed to the drafting of the paper. He was involved with data  
25 collection and coordination for the UK ISCOLE site.  
26

27 Martyn Standage is the PI of the UK ISCOLE study site, and contributed to the drafting of the  
28 paper.  
29

30 Catherine Barnaby provided input and expertise to the analysis of the study data and  
31 contributed to the drafting of the paper.  
32

33 Peter Katzmarzyk is the PI of ISCOLE across the 12-centre site, responsible for the design  
34 of the original study and oversight of data collection and analysis, and contributed to drafting  
35 the paper.  
36

37 We confirm that all authors had access to all of the data and can take responsibility for the  
38 integrity of the data and accuracy of the data analysis.  
39  
40

41 Data sharing statement

42  
43  
44 Data sharing: no additional data available.  
45  
46

47 URL to study protocol:

48 <http://bmcpublichealth.biomedcentral.com/articles/10.1186/1471-2458-13-900>  
49  
50  
51  
52  
53  
54  
55  
56  
57  
58  
59  
60

Figure 1: Trends in maturation status across weight categorisation

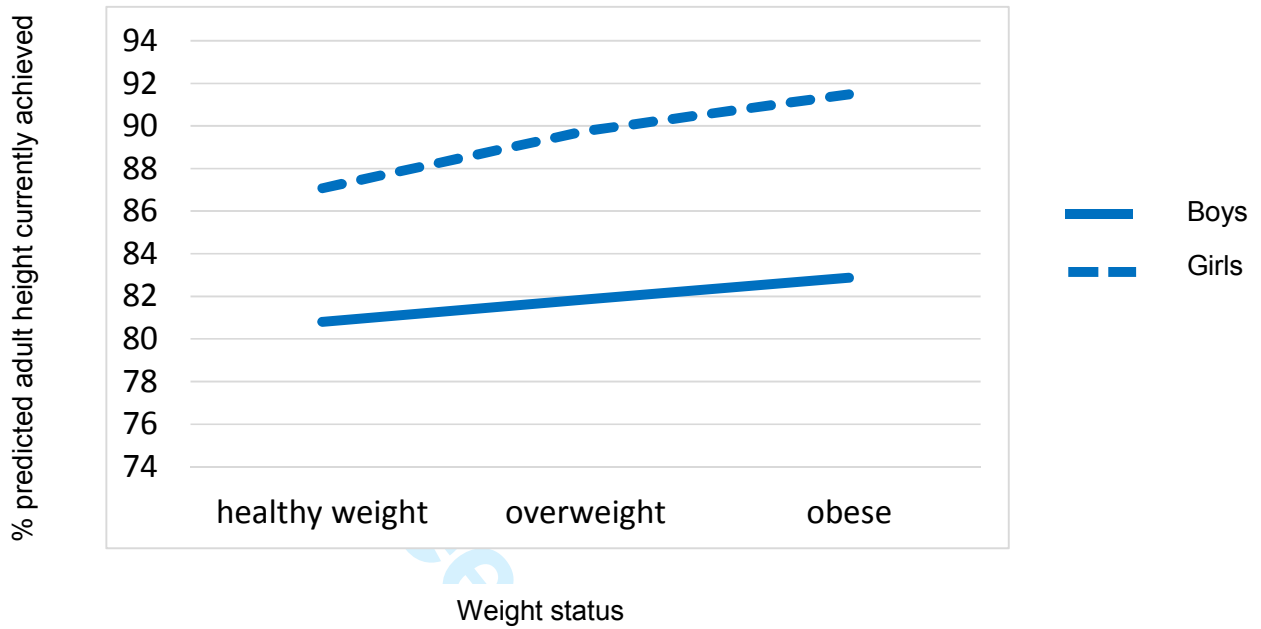

1  
2  
3  
4  
5  
6  
7  
8  
9  
10  
11  
12  
13  
14  
15  
16  
17  
18  
19  
20  
21  
22  
23  
24  
25  
26  
27  
28  
29  
30  
31  
32  
33  
34  
35  
36  
37  
38  
39  
40  
41  
42  
43  
44  
45  
46  
47  
48  
49  
50  
51  
52  
53  
54  
55  
56  
57  
58  
59  
60

review only

# BMJ Open

## Assessing the impact of adjusting for maturity in children's weight status classification in a cohort of UK children

|                                    |                                                                                                                                                                                                                                                                                                                                             |
|------------------------------------|---------------------------------------------------------------------------------------------------------------------------------------------------------------------------------------------------------------------------------------------------------------------------------------------------------------------------------------------|
| Journal:                           | <i>BMJ Open</i>                                                                                                                                                                                                                                                                                                                             |
| Manuscript ID                      | bmjopen-2016-015769.R1                                                                                                                                                                                                                                                                                                                      |
| Article Type:                      | Research                                                                                                                                                                                                                                                                                                                                    |
| Date Submitted by the Author:      | 06-Apr-2017                                                                                                                                                                                                                                                                                                                                 |
| Complete List of Authors:          | Gillison, Fiona; University of Bath, Department for Health<br>Cumming, Sean; University of Bath, Department for Health<br>Standage, Martyn; University of Bath, Department for Health<br>Barnaby, Catharine; University of Bath, Bath Institute for Mathematical<br>Innovation<br>Katzmarzyk, Peter; Pennington Biomedical Research Center, |
| <b>Primary Subject<br>Heading</b>: | Paediatrics                                                                                                                                                                                                                                                                                                                                 |
| Secondary Subject Heading:         | Epidemiology, Public health, Health policy                                                                                                                                                                                                                                                                                                  |
| Keywords:                          | childhood obesity, adolescent obesity, weight status, health promotion,<br>maturity, weight measurement                                                                                                                                                                                                                                     |
|                                    |                                                                                                                                                                                                                                                                                                                                             |

SCHOLARONE™  
Manuscripts

1  
2  
3 Assessing the impact of adjusting for maturity in children's weight  
4 status classification in a cohort of UK children  
5  
6  
7  
8  
9

10 Fiona Gillison, Sean Cumming, Martyn Standage, Catherine Barnaby, Peter Katzmarzyk  
11

12  
13 Corresponding author: Fiona Gillison, Senior Lecturer

14  
15 Centre for Motivation and Behaviour Change, Department for Health, University of Bath,  
16 Bath, BA2 7AY, UK  
17

18 [f.b.gillison@bath.ac.uk](mailto:f.b.gillison@bath.ac.uk), 01225 384387  
19

20  
21 Sean Cumming, Senior Lecturer

22  
23 Centre for Motivation and Behaviour Change, Department for Health, University of Bath,  
24 Bath, BA2 7AY, UK  
25

26  
27  
28 Martyn Standage, Professor

29  
30 Centre for Motivation and Behaviour Change, Department for Health, University of Bath,  
31 Bath, BA2 7AY, UK  
32

33  
34 Catherine Barnaby, Commercial Research Associate

35  
36 Bath Institute for Mathematical Innovation, University of Bath, Bath, BA2 7AY, UK  
37  
38  
39

40  
41 Peter Katzmarzyk, Professor

42  
43 Pennington Biomedical Research Centre, 6400 Perkins Road, Baton Rouge, LA 70808, USA  
44  
45  
46  
47

48 Word count: 2695  
49

50  
51  
52 Keywords: **childhood obesity, weight status, maturity, weight measurement**  
53  
54  
55  
56  
57  
58  
59  
60

**ABSTRACT**

**Objectives** To compare the weight categorisation of a cohort of UK children using standard procedures (i.e., comparing BMI centiles to age-matched UK reference data) versus an approach adjusted for maturation status (i.e., matching relative to biological age).

**Design** Analysis of data collected from an observational study of UK primary school children.

**Setting** Schools in south west England.

**Participants** Four hundred and seven 9-11 year old children (98% white British)

**Main outcome measures:** Weight status was classified using BMI centiles using (i) sex and chronological-age matched referents, and (ii) sex and biological-age matched referents (based on % of predicted adult stature) relative to UK 1990 reference growth charts. For both approaches, children were classified as a normal weight if  $>2^{\text{nd}}$  centile and  $<85^{\text{th}}$  centile, overweight if  $85^{\text{th}}$  and  $<95^{\text{th}}$  centiles, and obese if  $\geq 95^{\text{th}}$  centile.

**Results** Fifty-one children (12.5%) were overweight, and a further 51 obese (12.5%) according to standard chronological-age matched classifications. Adjustment for maturity resulted in 32% of overweight girls, and 15% of overweight boys being reclassified as a normal weight, and 11% and 8% of obese girls and boys respectively being reclassified as overweight. Early maturing children were 4.9 times more likely to be reclassified from overweight to normal weight than 'on-time' maturers (odds ratio 95% CI=1.3 to 19).

**Conclusions:** Incorporating assessments of maturational status into weight classification resulted in significant changes to the classification of early-maturing adolescents. Further research exploring the implications for objective health risk and wellbeing is needed.

**ARTICLE SUMMARY****Strengths and Limitations of this study**

- The analyses are based on objective height and weight measurements of 407 children taken by trained researchers implementing a rigorous standardised protocol.
- The approach is the first to demonstrate a simple and readily replicable means of exploring or adjusting for the impact of maturity timing on weight categorisation during late childhood /early adolescence.
- Although the sample was representative of the diversity of children in one geographical area of the UK, the data are not nationally representative and ethnic minority groups are particularly under-represented.

## INTRODUCTION

Childhood obesity is consistently linked to a greater risk of obesity in adulthood and the consequent increased risk to health through conditions such as diabetes, cardiovascular disease, and certain forms of cancer.[1] As a means of identifying children at elevated risk, the classification of children's weight status is widely practised by physicians and public health teams in many countries.[2-4] Yet, parents' recognition of when a child is overweight can be as low as 25%.[5] This is in part exacerbated by the normalisation of being overweight, with approximately 33% of UK 10-11 year olds now being classified as overweight or obese. Schemes such as England's National Child Measurement Programme (NCMP), through which over 95% of 4-5 and 10-11 year old children are weighed each year,[6] provide excellent data for monitoring population-level obesity. However, the NCMP has also been used to provide objective feedback to parents on their child's weight status with a view to improving awareness and engaging families with weight management services. To date however, providing NCMP data as feedback has resulted in little uptake of weight management support,[7] and may have alienated many parents who are angry and/or disbelieving of the information provided.[7-9]

Research investigating the source of parental anger and rejection of the weighing and measuring of children highlights that many parents fear that the risk of harm to their child's health and wellbeing is greater from *labelling* them as overweight (e.g., in undermining self-esteem and triggering eating disorder symptomology and poor self-esteem) than it is from *being* overweight.[7-11] In the absence of conclusive evidence that this is not the case, and given that strong negative associations between parent-child weight talk and well-being have been reported,[12] health professionals have a responsibility to ensure that any intervention that could incur such risks is based on accurate information and does not target those for whom it may not be necessary.

A primary reason that parents offer for being distrusting of the information provided about their child's weight status is that such judgements fail to account for individual



1  
2  
3 differences. In particular, parents argue that when children approach puberty, judgements of  
4 their weight status that do not take account of relative differences in pubertal development  
5 are not valid.[8] While there is reliable evidence that earlier puberty is associated with a  
6 greater risk of obesity, and thus that the two may be somewhat conflated,[13] researchers  
7 have also raised the question of whether it is appropriate to judge weight status based on  
8 BMI during puberty when some increase in body fat is normal and healthy.[14,15] The use of  
9 BMI for establishing weight status in relation to health risk in children is certainly problematic,  
10 especially during the period of peak growth velocity (average onset 11.8 years in girls, and  
11 14.0 years in boys)[16] when height (and therefore the weight to height ratio on which the  
12 BMI is based) is liable to considerable change. Past work using Dual Energy X-ray  
13 Absorption scans to provide accurate assessments of body fat demonstrate a considerable  
14 normative increase in fat mass around the trunk in both boys and girls in the lead up to the  
15 period of peak height velocity (i.e., the main event referred to as 'puberty') regardless of  
16 physical activity and dietary fat intake.[17,18] Yet, these studies have not used data to adjust  
17 estimates of a child's weight status according to their maturity status.  
18  
19  
20  
21  
22  
23  
24  
25  
26  
27  
28  
29  
30  
31  
32  
33

34 There is currently no research reporting on the effect that adjustment for pubertal  
35 status could have on population estimates of obesity, or of how we could adjust the  
36 classification of risk for children who are advanced in maturity through acceptable, non-  
37 invasive means. Despite this lack of work, it would be possible to do so within a practice  
38 setting via using non-invasive means of estimating children's maturity status that are  
39 currently available. Accordingly, the aim of this study is to investigate the degree to which  
40 the weight categorisation of a cohort of UK 9-11 year old children differs when estimated  
41 through comparison of their BMI against chronological age- and sex-matched UK BMI  
42 reference charts (standard UK practice), versus when estimated using reference charts  
43 matched to their biological (i.e., maturity adjusted) age. This analysis is undertaken with a  
44 view to providing a means of adjusting for expected maturity-related increases in body fat  
45 mass among children and adolescents to provide more accurate estimates of obesity  
46  
47  
48  
49  
50  
51  
52  
53  
54  
55  
56  
57  
58  
59  
60

1  
2  
3 prevalence. The process of generating more tailored estimates of weight status may also  
4 help to engage parents in discussions about a healthy weight for their child and has the  
5 potential to increase acceptance that a child is overweight.  
6  
7  
8  
9

## 10 **METHODS**

### 11 **Participants**

12  
13 Participants were 407 9-11 year old children who formed the UK sample of the International  
14 Study of Childhood Obesity, Lifestyle and the Environment (ISCOLE).[19] Participants were  
15 recruited from 26 primary schools in south west England. Schools were stratified according  
16 to pupils socio-economic status (SES; based on levels of entitlement to free school meals;  
17 high, mid, low) of the catchment area and weighted by size (large, small), and then  
18 approached sequentially to maximise the diversity of the sample of participating children. All  
19 Year 6 children in participating schools were eligible to take part. The analytical sample  
20 used in this study showed little ethnic diversity, 98% were white British, compared with 90-  
21 97% in the local authorities where data were collected, and 87% nationally.  
22  
23  
24  
25  
26  
27  
28  
29  
30  
31  
32

### 33 **Procedure**

34 Detailed information of the standardised data collection protocol is published elsewhere.[19]  
35 Written consent for the study was obtained from head teachers and parents, and assent  
36 provided by children prior to participation. A battery of anthropometric measurements were  
37 taken by staff trained in the ISCOLE protocol. Standing height was measured to the nearest  
38 0.1 cm without shoes with the participant's head in the Frankfort Plane and at the end of a  
39 deep inhalation using a Seca 213 portable stadiometer (Hamburg, Germany). Body mass  
40 was measured to the nearest 0.1 kg using a portable Tanita SC- 240 Body Composition  
41 Analyzer (Arlington Heights, IL). Subsequently, Body Mass Index (BMI; body mass  
42 (kg)/height (m<sup>2</sup>)) was calculated. Overarching ethical approval for the ISCOLE protocol was  
43 provided by the Pennington Biomedical Research Center Institutional Review Board, and  
44 local ethical approval was also obtained for the UK site by the institutional research ethics  
45  
46  
47  
48  
49  
50  
51  
52  
53  
54  
55  
56  
57  
58  
59  
60

1  
2  
3 committee. Data were entered into a secure central web-based management system,  
4  
5 audited by the ISCOLE coordinating centre.  
6

7  
8 Classification of maturity and weight status. Maturity status was calculated by a non-  
9  
10 invasive means (i.e., the Kamis-Roche method),[20] based on the percentage of predicted  
11  
12 adult stature that a child had attained at measurement. This method holds that among youth  
13  
14 of the same age, individuals who are closer to their mature (i.e., adult) stature are more  
15  
16 advanced in biological maturity. A boy of 12 years who has attained 90% of predicted adult  
17  
18 height, for example, would be considered more mature than a boy, of the same age and  
19  
20 height, who had obtained 80% predicted adult height. The Khamis-Roche method predicts  
21  
22 adult height from the child's age, height, and weight, and mid-height of the biological  
23  
24 parents. Self-reported parent heights were adjusted for over-estimation using equations  
25  
26 generated from over 1000 measured and self-estimated heights from adults.[21] The  
27  
28 Khamis-Roche method has been validated against skeletal age in American youth[22] and  
29  
30 has also been applied in studies of British youth.[23-25] The median error bounds (i.e. the  
31  
32 confidence interval within which 50% of the cases for true height will fall) between actual and  
33  
34 predicted adult stature between the ages of 9 to 12 fall between 2.0 and 2.5 cm in boys, and  
35  
36 1.9 and 2.1 cm in girls, respectively.[20]  
37

38  
39 Maturity status was calculated using z-scores for the percentage of mature height  
40  
41 achieved: for group comparisons, z-scores between -1.0 and + 1.0 were considered 'on  
42  
43 time', z-scores below -1.0 'late maturers', and z-scores above 1.0, 'early maturers'.[26] To  
44  
45 obtain an estimate of biological age, percentage of adult stature was compared with age and  
46  
47 sex specific reference standards generated from the UK 1990 growth reference data.[27]  
48  
49 Reference standards for percentage of adult stature attained were calculated at intervals of  
50  
51 0.1 years for each sex. Percentages were based upon mean values for stature attained at  
52  
53 each age interval, and the mean values for stature attained at and above 18 years of age  
54  
55 (177.6 cm in males; 163.7 cm in females). For example, a girl of 10.5 years who had  
56  
57 attained 91.5% of predicted adult stature would have presented a value equivalent to the  
58  
59  
60

1  
2  
3 mean percentage of adult stature attained by UK girls aged 12.0 years. Accordingly, she  
4 would be assigned a maturational (biological) age of 12.0 years. For both standard and  
5 adjusted calculations of weight status, and in line with the threshold used for population  
6 assessment using NCMP data by Public Health England in 2016,[28] overweight and obesity  
7 was judged through reference to the UK1990 BMI reference data.[29] Children with a BMI  $\geq$   
8 the 85<sup>th</sup> centile and  $<95^{\text{th}}$  centile were classified as overweight, and children over the 95<sup>th</sup>  
9 centile as obese. The difference between the two classification systems (i.e., standard, and  
10 maturity adjusted) stemmed from the reference curve against which the child's BMI was  
11 compared. To calculate standard classifications, children were matched to the reference  
12 curve appropriate to their sex and chronological age in months.  
13  
14  
15  
16  
17  
18  
19  
20  
21  
22

### 23 **Analysis**

24 We examined whether the classification of weight differed significantly when using standard  
25 versus adjusted BMI centiles using chi-square tests, and explored whether there were  
26 differences in the number of children reclassified according to sex or maturity status using  
27 ANOVA. Effect sizes were also computed to provide an indication of the meaningfulness of  
28 statistical differences;  $\eta^2$  indicates the effect size of F statistics in ANOVA; values  $\geq 0.022$   
29 are considered a small but meaningful effect,  $\geq 0.059$  a moderate effect and 0.14 and  
30 upwards a large effect.[30] Cohen's d for 2-way comparisons ( $\geq 0.2$  and  $\leq 0.5$  considered a  
31 small effect,  $\geq 0.5$  and  $\leq 0.8$  a moderate effect, and  $\geq 0.8$  a large effect). Odds ratios of the  
32 probability of change in classification were calculated for early, on-time, and late maturers.  
33  
34  
35  
36  
37  
38  
39  
40  
41  
42  
43  
44

### 45 **RESULTS**

46 The sample comprised 407 children (78% of the 525 involved in the study; 223 girls (55%),  
47 Mean age 10.9 years, SD=0.5, range 9.3 -11.8) whose height and weight were objectively  
48 measured and whose biological parents self-reported their own heights. Average BMI was  
49 18.3 (SD=3.0), and according to usual age and sex matched cut-offs, 51 (12.5%) children  
50 were classified as overweight, and a further 51 (12.5%) obese. Slightly more girls than boys  
51 were overweight or obese (26% versus 24%, respectively). No children were underweight  
52  
53  
54  
55  
56  
57  
58  
59  
60

1  
2  
3 (BMI < 2<sup>nd</sup> centile). On average, girls had reached a more advanced stage of maturity than  
4 boys (girls averaged 88% expected adult height, vs 81% for boys). Five percent of boys and  
5 9% of girls were late maturers, 71% of boys and 61% of girls on-time, and 24% of boys and  
6 30% of girls were early maturers.  
7  
8  
9

10  
11  
12  
13 The results of a 2-way (gender and weight status) ANOVA indicated that children were  
14 significantly more likely to be classified as overweight or obese if they were biologically more  
15 mature ( $F(5, 401)=150, p<.001; \eta^2$  for maturity status=0.16). This was the case for both boys  
16 and girls ( $\eta^2$  for sex=0.65), although it was more pronounced in girls (interaction term;  
17  $F(2,401)=5.5, p=0.005; \eta^2=0.03$ ) (Figure 1).  
18  
19  
20  
21  
22

23  
24 Figure 1: Trends in maturation status across weight categorisation  
25 <Figure 1 here>  
26  
27

### 28 **Comparisons with adjusted values**

29  
30 For the sample as a whole, the mean difference between chronological age and biological  
31 age (i.e., age for the given percentage of expected adult height achieved) was 0.18 years  
32 (SD = 0.6), ranging from a delay of 1.67 years, to being advanced by 5.5 years. This latter  
33 value refers to a girl with a height of 166cm, who had reached 99.9% of her predicted adult  
34 height; her weight status did not change when adjusting for developmental stage (she was  
35 classified as obese using both systems).  
36  
37  
38  
39  
40  
41

42 When BMI centile was adjusted for maturation, there was a small decrease in the  
43 proportion of children classified as overweight (from 12.5 to 10.6%), and obese (from 12.5%  
44 to 11.8%). This related to a small but significant decrease in the mean estimated BMI centile  
45 within the sample; standard vs adjusted calculation Mean BMI = 58.2 (SD=30.1) vs 57.4  
46 (SD=28.8) ( $t(406)=3.09, p=.002; d=0.02$ ). Overall, 5 (11%) overweight or obese boys, and 13  
47 (22%) of overweight or obese girls were reclassified into a lower weight category (Chi square  
48 = 583,  $p<0.001$ , Table 1). Only one boy and three girls were reclassified into a higher weight  
49 category.  
50  
51  
52  
53  
54  
55  
56  
57  
58  
59  
60

Of the 111 children judged to be early maturers, 59% were classified as a healthy weight using standard chronological age growth reference charts (19% overweight, and 23% obese), compared with 67% following adjustment for maturity (13% overweight and 21% obese). Overweight early maturers (i.e., those we consider most important to 'get right' on the basis of requiring intervention or not) were 4.9 times more likely to be reclassified as a normal weight following maturity adjustment than their overweight on-time peers (43% vs 13%; odds ratio = 4.9; 95% CI 1.25 to 19). There was no apparent difference for obese children reclassified as overweight (8% vs 12%; odds ratio = 0.67, 95% CI: 0.10 to 4.4).

Table 1: Comparison of weight classifications following BMI centile adjustment

| Standard centiles | Adjusted centiles                |                    |               | Total N |
|-------------------|----------------------------------|--------------------|---------------|---------|
|                   | Healthy weight<br>n(%)           | Overweight<br>n(%) | Obese<br>n(%) |         |
| Boys              | Chi-square (df=4) = 299, p<0.001 |                    |               |         |
| Healthy weight    | 139 (>99)                        | 1 (<1)             | 0             | 142     |
| Overweight        | 3 (15)                           | 17 (85)            | 0             | 20      |
| Obese             | 0                                | 2(8)               | 22 (92)       | 24      |
| Girls             | Chi-square (df=4) = 290, p<0.001 |                    |               |         |
| Healthy weight    | 164 (>99)                        | 1 (<1)             | 0             | 165     |
| Overweight        | 10 (32)                          | 19 (61)            | 2 (7)         | 31      |
| Obese             | 0                                | 3 (11)             | 24 (89)       | 27      |

## DISCUSSION

A comparison of the weight status categorisation of a sample of 9-11 year old UK children according to standard chronological age versus biological age growth charts resulted in the downward-classification of 18% of overweight and obese children, representing 22% of

1  
2  
3 overweight girls and 11% of overweight boys. Only four children (1%) were reclassified into a  
4 higher weight category. This effect was more pronounced in girls, for whom almost one in  
5 three girls who were reported to be overweight would not have been classified as such using  
6 a maturity-adjusted approach. Given the limited age range of the sample, and that boys  
7 mature on average two years later than girls, the effect may reach a similar extent for boys  
8 but at a later age.  
9  
10  
11  
12  
13  
14

15  
16 Within this study, we attempted to quantify the difference that adjusting judgements  
17 of weight status by a child's level of maturity could have on both population estimates of  
18 childhood overweight and obesity, and on the treatment of individual children and families.  
19 The strengths of work reside with basing the analysis on a broad cohort of children using  
20 robust objective measurement protocols at an age when the effects of puberty are first  
21 starting to emerge, and importantly at the age when weight measurement by health  
22 professionals takes place and the lack of consideration for maturity is known to be a source  
23 of tension between parents and health services. A limitation of this study is that the original  
24 UK 1990 dataset bases the norms on which the BMI centiles that we (and health services)  
25 use include children of all maturity levels, not only on-time maturers. However, it is likely  
26 that the differences observed in our analyses would have been greater, rather than smaller,  
27 if the reference data had also standardised for maturity status (i.e., if off-time maturers could  
28 be removed). We also note that children from ethnic minorities were under-represented in  
29 our sample.  
30  
31  
32  
33  
34  
35  
36  
37  
38  
39  
40  
41  
42  
43  
44

45 BMI is acknowledged to be a useful but imperfect proxy indicator of fat mass (and  
46 excess fat mass) and subsequent health risk.[31-33] Past work has explored how  
47 moderating factors such as sex, race and ethnicity may influence the accuracy of BMI in  
48 predicting health risk,[34,35] however whereas the impact of puberty on BMI at a given  
49 chronological age is well established, few studies have attempted to quantify the impact of  
50 biological maturity has on the accuracy of weight classifications.[36] A sensitivity and  
51 specificity analysis of BMI in classifying obesity (as measured by body fat mass established  
52  
53  
54  
55  
56  
57  
58  
59  
60



1  
2  
3 through DXA scans, establishing puberty through tanner scales) in adolescents of all ages in  
4 New Zealand reported 6-12% of misclassification [36]. Nonetheless, the present study is the  
5 first to demonstrate how weight classification may account for children's maturity status in  
6 addition to age and sex when benchmarking BMI against growth reference charts, and to  
7 report on the likely effects (in terms of changes to weight classifications) of doing so. As the  
8 healthy range for BMI increases with age up to adulthood as a reflection of expected healthy  
9 increases in body fat during puberty, it is likely that early maturing children and adolescents  
10 can be a normal or healthy weight at a higher BMI than their later maturing peers: however,  
11 research specifically mapping maturity-adjusted weight categorisation to health risk is  
12 needed to formally test this hypothesis.  
13  
14  
15  
16  
17  
18  
19  
20  
21  
22  
23

24 These findings post two key implications for practice. First, they raise the question of  
25 whether we should adjust for maturity when judging whether children or adolescents are  
26 overweight. Given the lack of evidence that weight monitoring (as undertaken through the  
27 NCMP and similar programmes) results in positive effects on children's health and health  
28 behaviours,[7,37] and some evidence that such monitoring activities could undermine their  
29 wellbeing and self-concept,[8,9] there seems little risk that adjusting for biological maturity  
30 will result in harm (i.e., children are not identified, and do not receive effective help).  
31  
32 Whereas the practice could be of benefit if we are better able to raise awareness and  
33 engage with parents whose children remain classified as overweight or obese following  
34 adjustment as a result of showing that we have tailored the judgement to their child's level of  
35 biological maturity. Second, the findings suggest that early maturing children are particularly  
36 at risk of misclassification; this group are already known to be at greater risk of poor mental  
37 health[38-40] and may be particularly susceptible to the negative impact of such evaluations  
38 as they generally hold more negative perceptions of the physical self (lower perceptions of  
39 attractiveness, sports competence, and fitness.[41] As such, early maturing children and  
40 adolescents represent a vulnerable group with whom we should be particularly careful to  
41 minimise the potential unintended negative consequences of health policies.  
42  
43  
44  
45  
46  
47  
48  
49  
50  
51  
52  
53  
54  
55  
56  
57  
58  
59  
60



1  
2  
3  
4  
5  
6  
7  
8  
9  
10  
11  
12  
13  
14  
15  
16  
17  
18  
19  
20  
21  
22  
23  
24  
25  
26  
27  
28  
29  
30  
31  
32  
33  
34  
35  
36  
37  
38  
39  
40  
41  
42  
43  
44  
45  
46  
47  
48  
49  
50  
51  
52  
53  
54  
55  
56  
57  
58  
59  
60

For peer review only

## REFERENCES

1. Park MH, Falconer C, Viner RM, Kinra S. The impact of childhood obesity on morbidity and mortality in adulthood: a systematic review. *Obesity Reviews*. 2012;13(11):985-1000.
2. NHS Digital. National Child Measurement Programme [cited 2016 Dec 15] Available from: <http://content.digital.nhs.uk/NCMP>
3. Wieske RC, Nijhuis MG, Carmiggelt BC, Wagenaar-Fischer MM, Boere-Boonekamp MM. Preventive youth health care in 11 European countries: an exploratory analysis. *International Journal of Public Health*. 2012;57(3):637-41.
4. Roberto C, Soo J, Pomeranz L. Regulatory strategies for preventing obesity and improving public health. *Managing and Preventing Obesity: Behavioural Factors and Dietary Interventions*. 2014:277.
5. Tompkins CL, Seablom M, Brock DW. Parental Perception of Child's Body Weight: A Systematic Review. *Journal of Child and Family Studies*. 2015;24(5):1384-91.
6. NHS Digital. National Child Measurement Programme: England, 2015/16 school year Data Quality Statement. 2016 Nov 3 [cited 2016 Dec 15] Available from: <http://content.digital.nhs.uk/catalogue/PUB22269/nati-chil-meas-prog-eng-2015-2016-qual.pdf>
7. Falconer CL, Park MH, Coker H, Skow A, Black J, Saxena S, et al. The benefits and harms of providing parents with weight feedback as part of the national child measurement programme: a prospective cohort study. *BMC Public Health*. 2014;14:549.
8. Gillison F, Beck F, Lewitt J. Exploring the basis for parents' negative reactions to being informed that their child is overweight. *Public Health Nutrition*. 2014;17(5):987-97.
9. Grimmett C, Croker H, Carnell S, Wardle J. Telling parents their child's weight status: psychological impact of a weight-screening program. *Pediatrics*. 2008;122(3):e682-8.
10. Syrad H, Falconer C, Cooke L, Saxena S, Kessel A, Viner R, et al. Health and happiness is more important than weight': a qualitative investigation of the views of

- 1  
2  
3 parents receiving written feedback on their child's weight as part of the National Child  
4 Measurement Programme. *Journal of Human Nutrition and Dietetics*. 2014; 28(1):47-55.  
5  
6  
7 11. Borra ST, Kelly L, Shirreffs MB, Neville K, Geiger CJ. Developing health messages:  
8 qualitative studies with children, parents, and teachers help identify communications  
9 opportunities for healthful lifestyles and the prevention of obesity. *Journal of the*  
10 *American Dietetic Association*. 2003;103(6):721-8.  
11  
12  
13 12. Gillison F, Lorenc A, Sleddens E, Williams S, Atkinson L. Can it be harmful for parents  
14 to talk to their child about their weight? A meta-analysis. *Preventive Medicine*. 2016;  
15 93:135-46.  
16  
17  
18 13. Prentice P, Viner RM. Pubertal timing and adult obesity and cardiometabolic risk in  
19 women and men: a systematic review and meta-analysis. *International Journal of*  
20 *Obesity*. 2013;37(8):1036-43.  
21  
22  
23 14. O'Dea J & Abraham S. Should body mass index be used in adolescents? *Lancet*. 1995;  
24 345:657.  
25  
26  
27 15. Bini V, Celi F, Berioli MG, Bacosi ML, Stella P, Giglio P, Tosti L & Falorni A. Body mass  
28 index in children and adolescents according to age and pubertal stage. *European*  
29 *Journal of Clinical Nutrition*. 2000;54:214.  
30  
31  
32 16. Malina RM, Bouchard C, Bar-Or O. Growth, maturation, and physical activity. *Human*  
33 *Kinetics*; 2004.  
34  
35  
36 17. Sherar LB, Esliger DW, Baxter-Jones AD, Tremblay MS. Age and gender differences in  
37 youth physical activity: does physical maturity matter? *Medicine and Science in Sports*  
38 *and Exercise*. 2007;39(5):830.  
39  
40  
41 18. Sherar LB, Eisenmann JC, Chilibeck PD, Muhajarine N, Martin S, Bailey DA, et al.  
42 Relationship between trajectories of trunk fat mass development in adolescence and  
43 cardiometabolic risk in young adulthood. *Obesity*. 2011;19(8):1699-706.  
44  
45  
46 19. Katzmarzyk PT, Barreira TV, Broyles ST, Champagne CM, Chaput JP, Fogelholm M, et  
47 al. The International Study of Childhood Obesity, Lifestyle and the Environment  
48 (ISCOLE): design and methods. *BMC Public Health*. 2013;13:900.  
49  
50  
51  
52  
53  
54  
55  
56  
57  
58  
59  
60

- 1  
2  
3 20. Khamis HJ, Roche AF. Predicting adult stature without using skeletal age: the Khamis-  
4 Roche method. *Pediatrics*. 1994;94(4):504-7.  
5  
6  
7 21. Epstein LH, Valoski AM, Kalarchian MA, McCurley J. Do children lose and maintain  
8 weight easier than adults: a comparison of child and parent weight changes from six  
9 months to ten years. *Obesity Research*. 1995;3(5):411-7.  
10  
11  
12 22. Malina RM, Dompier TP, Powell JW, Barron MJ, Moore MT. Validation of a noninvasive  
13 maturity estimate relative to skeletal age in youth football players. *Clinical Journal of*  
14 *Sport Medicine*. 2007;17(5):362-8.  
15  
16  
17 23. Cumming SP, Standage M, Gillison F, Malina RM. Sex differences in exercise behavior  
18 during adolescence: is biological maturation a confounding factor? *Journal of*  
19 *Adolescent Health*. 2008;42(5):480-5.  
20  
21  
22 24. Cumming SP, Standage M, Loney T, Gammon C, Neville H, Sherar LB, et al. The  
23 mediating role of physical self-concept on relations between biological maturity status  
24 and physical activity in adolescent females. *Journal of Adolescence*. 2011;34(3):465-73.  
25  
26  
27 25. Hunter Smart JE, Cumming SP, Sherar LB, Standage M, Neville H, Malina RM. Maturity  
28 associated variance in physical activity and health-related quality of life in adolescent  
29 females. A mediated effects model. *Journal of Physical Activity & Health*. 2012;9(1):86-  
30 95.  
31  
32  
33 26. Malina RM, Cumming SP, Morano PJ, Barron M, Miller SJ. Maturity status of youth  
34 football players: a noninvasive estimate. *Medicine & Science in Sports & Exercise*.  
35 2005;37(6):1044-52.  
36  
37  
38 27. Freeman J, Cole T, Chinn S, Jones P, White E, Preece M. Cross sectional stature and  
39 weight reference curves for the UK, 1990. *Archives of Disease in Childhood*.  
40 1995;73(1):17-24.  
41  
42  
43 28. Public Health England [internet] 2016. Measuring and interpreting BMI in Children [cited  
44 2016 Dec 15]. Available from:  
45 [http://www.noo.org.uk/NOO\\_about\\_obesity/measurement/children](http://www.noo.org.uk/NOO_about_obesity/measurement/children)  
46  
47  
48  
49  
50  
51  
52  
53  
54  
55  
56  
57  
58  
59  
60

- 1  
2  
3 29. Cole TJ, Freeman JV, Preece MA. Body mass index reference curves for the UK, 1990.  
4  
5 Archives of Disease in Childhood. 1995;73(1):25-9.  
6
- 7 30. Fritz CO, Morris PE, Richler JJ. Effect size estimates: current use, calculations, and  
8  
9 interpretation. Journal of Experimental Psychology. 2012;141(1):2.  
10
- 11 31. Freedman DS, Mei Z, Srinivasan SR, Berenson GS, Dietz WH. Cardiovascular risk  
12  
13 factors and excess adiposity among overweight children and adolescents: the Bogalusa  
14  
15 Heart Study. Journal of Pediatrics. 2007;150(1):12-7. e2.  
16
- 17 32. Freedman DS, Sherry B. The validity of BMI as an indicator of body fatness and risk  
18  
19 among children. Pediatrics. 2009;124(Supplement 1):S23-S34.  
20
- 21 33. Mei Z, Grummer-Strawn LM, Pietrobelli A, Goulding A, Goran MI, Dietz WH. Validity of  
22  
23 body mass index compared with other body-composition screening indexes for the  
24  
25 assessment of body fatness in children and adolescents. The American Journal of  
26  
27 Clinical Nutrition. 2002;75(6):978-85.  
28
- 29 34. Duncan JS, Duncan EK, Schofield G. Accuracy of body mass index (BMI) thresholds for  
30  
31 predicting excess body fat in girls from five ethnicities. Asia Pacific Journal of Clinical  
32  
33 Nutrition. 2009;18(3):404-11.  
34
- 35 35. Zimmermann MB, Gubeli C, Puntener C, Molinari L. Detection of overweight and obesity  
36  
37 in a national sample of 6-12-y-old Swiss children: accuracy and validity of reference  
38  
39 values for body mass index from the US Centers for Disease Control and Prevention  
40  
41 and the International Obesity Task Force. American Journal of Clinical Nutrition.  
42  
43 2004;79(5):838-43.  
44
- 45 36. Taylor RW, Falorni A, Jones IE, Goulding A. Identifying adolescents with high  
46  
47 percentage body fat: a comparison of BMI cutoffs using age and stage of pubertal  
48  
49 development compared with BMI cutoffs using age alone. European Journal of Clinical  
50  
51 Nutrition. 2003;57(6):764-769  
52
- 53 37. Nihiser AJ, Lee SM, Wechsler H, McKenna M, Odom E, Reinold C, et al. BMI  
54  
55 measurement in schools. Pediatrics. 2009;124(Supplement 1):S89-S97.  
56  
57  
58  
59  
60

- 1  
2  
3 38. Niven A, Fawkner S, Knowles A-M, Stephenson C. Maturational differences in physical  
4 self-perceptions and the relationship with physical activity in early adolescent girls.  
5  
6 Pediatric Exercise Science. 2007;19(4):472-80.  
7  
8  
9 39. Kaltiala-Heino R, Marttunen M, Rantanen P, Rimpelä M. Early puberty is associated  
10 with mental health problems in middle adolescence. Social Science & Medicine.  
11  
12 2003;57(6):1055-64.  
13  
14  
15 40. Laitinen-Krispijn S, Ende J, Hazebroek-Kampschreur A, Verhulst F. Pubertal maturation  
16 and the development of behavioural and emotional problems in early adolescence. Acta  
17  
18 Psychiatrica Scandinavica. 1999;99(1):16-25.  
19  
20  
21 41. Cumming SP, Sherar LB, Smart JEH, Rodrigues AM, Standage M, Gillison FB, et al.  
22  
23 Physical activity, physical self-concept, and health-related quality of life of extreme early  
24  
25 and late maturing adolescent girls. Journal of Early Adolescence. 2012;32(2):269-92.  
26  
27  
28  
29  
30  
31  
32  
33  
34  
35  
36  
37  
38  
39  
40  
41  
42  
43  
44  
45  
46  
47  
48  
49  
50  
51  
52  
53  
54  
55  
56  
57  
58  
59  
60

1  
2  
3 Competing interests:

4 None to declare  
5  
6  
7

8 Funding

9  
10 The ISCOLE study on which this paper is based was funded by The Coca-Cola Company.  
11 All authors except for CB were recipients of this grant. The funder had no role in study  
12 design, data collection and analysis, decision to publish, or preparation of the manuscript. All  
13 researchers were independent of the funders in all aspects of their research.  
14

15 Details of contributors

16  
17  
18 Fiona Gillison led in the drafting of the paper, development of the idea for the use of the  
19 ISCOLE data in this way (with SC), conduct of analyses (with CB). She was a CI for the UK  
20 ISCOLE site, involved with data collection, researcher training and quality oversight.  
21

22 Sean Cumming provided expertise in the assessment of maturity and interpretation of  
23 findings, contributed to the development of the concept for using the ISCOLE data in this  
24 way (with FG), and contributed to the drafting of the paper. He was involved with data  
25 collection and coordination for the UK ISCOLE site.  
26

27 Martyn Standage is the PI of the UK ISCOLE study site, and contributed to the drafting of the  
28 paper.  
29

30 Catherine Barnaby provided input and expertise to the analysis of the study data and  
31 contributed to the drafting of the paper.  
32

33 Peter Katzmarzyk is the PI of ISCOLE across the 12-country sites, responsible for the  
34 design of the original study and oversight of data collection and analysis, and contributed to  
35 drafting the paper.  
36

37 We confirm that all authors had access to all of the data and can take responsibility for the  
38 integrity of the data and accuracy of the data analysis.  
39  
40

41 Data sharing statement

42  
43  
44 Data sharing: no additional data available.  
45

46 URL to study protocol:

47 <http://bmcpublichealth.biomedcentral.com/articles/10.1186/1471-2458-13-900>  
48  
49  
50  
51  
52  
53  
54  
55  
56  
57  
58  
59  
60

1  
2  
3  
4  
5  
6  
7  
8  
9  
10  
11  
12  
13  
14  
15  
16  
17  
18  
19  
20  
21  
22  
23  
24  
25  
26  
27  
28  
29  
30  
31  
32  
33  
34  
35  
36  
37  
38  
39  
40  
41  
42  
43  
44  
45  
46  
47  
48  
49  
50  
51  
52  
53  
54  
55  
56  
57  
58  
59  
60

Figure 1: Trends in maturation status across weight categorisation

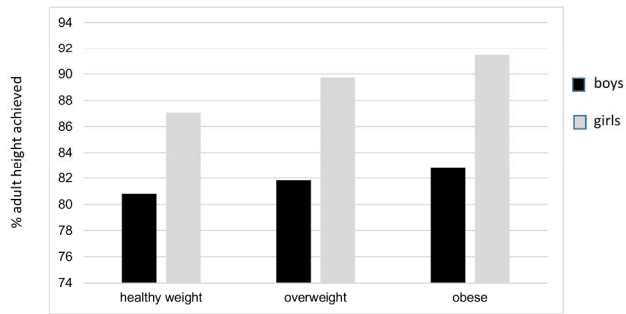

209x296mm (300 x 300 DPI)



# BMJ Open

## Assessing the impact of adjusting for maturity in weight status classification in a cross-sectional sample of UK children

|                                 |                                                                                                                                                                                                                                                                                                                                             |
|---------------------------------|---------------------------------------------------------------------------------------------------------------------------------------------------------------------------------------------------------------------------------------------------------------------------------------------------------------------------------------------|
| Journal:                        | <i>BMJ Open</i>                                                                                                                                                                                                                                                                                                                             |
| Manuscript ID                   | bmjopen-2016-015769.R2                                                                                                                                                                                                                                                                                                                      |
| Article Type:                   | Research                                                                                                                                                                                                                                                                                                                                    |
| Date Submitted by the Author:   | 16-May-2017                                                                                                                                                                                                                                                                                                                                 |
| Complete List of Authors:       | Gillison, Fiona; University of Bath, Department for Health<br>Cumming, Sean; University of Bath, Department for Health<br>Standage, Martyn; University of Bath, Department for Health<br>Barnaby, Catharine; University of Bath, Bath Institute for Mathematical<br>Innovation<br>Katzmarzyk, Peter; Pennington Biomedical Research Center, |
| <b>Primary Subject Heading</b>: | Paediatrics                                                                                                                                                                                                                                                                                                                                 |
| Secondary Subject Heading:      | Epidemiology, Public health, Health policy                                                                                                                                                                                                                                                                                                  |
| Keywords:                       | childhood obesity, adolescent obesity, weight status, health promotion, maturity, weight measurement                                                                                                                                                                                                                                        |
|                                 |                                                                                                                                                                                                                                                                                                                                             |

SCHOLARONE™  
Manuscripts

1  
2  
3 1 Assessing the impact of adjusting for maturity in weight status  
4 2 classification in a cross-sectional sample of UK children  
5 3  
6 4  
7  
8  
9

10 5 Fiona Gillison, Sean Cumming, Martyn Standage, Catherine Barnaby, Peter Katzmarzyk  
11 6

12 7 Corresponding author: Fiona Gillison, Senior Lecturer

13 8 Centre for Motivation and Behaviour Change, Department for Health, University of Bath,  
14 9 Bath, BA2 7AY, UK

15 10 [f.b.gillison@bath.ac.uk](mailto:f.b.gillison@bath.ac.uk), 01225 384387  
16 11

17 12 Sean Cumming, Senior Lecturer

18 13 Centre for Motivation and Behaviour Change, Department for Health, University of Bath,  
19 14 Bath, BA2 7AY, UK

20 15  
21 16 Martyn Standage, Professor

22 17 Centre for Motivation and Behaviour Change, Department for Health, University of Bath,  
23 18 Bath, BA2 7AY, UK

24 19  
25 20 Catherine Barnaby, Commercial Research Associate

26 21 Bath Institute for Mathematical Innovation, University of Bath, Bath, BA2 7AY, UK  
27 22

28 23  
29 24 Peter Katzmarzyk, Professor

30 25 Pennington Biomedical Research Centre, 6400 Perkins Road, Baton Rouge, LA 70808, USA  
31 26

32 27  
33 28 Word count: 2695  
34 29

35 30 Keywords: **childhood obesity, weight status, maturity, weight measurement**  
36 31  
37 32

1  
2  
3 1 **ABSTRACT**

4 2 **Objectives** To compare the weight categorisation of a cohort of UK children using standard  
5  
6  
7 3 procedures (i.e., comparing BMI centiles to age-matched UK reference data) versus an  
8  
9 4 approach adjusted for maturation status (i.e., matching relative to biological age).

10  
11 5 **Design** Analysis of data collected from an observational study of UK primary school  
12  
13 6 children.

14  
15 7 **Setting** Schools in south west England.

16  
17 8 **Participants** Four hundred and seven 9-11 year old children (98% white British)

18  
19 9 **Main outcome measures:** Weight status was classified using BMI centiles using (i) sex and  
20  
21 10 chronological-age matched referents, and (ii) sex and biological-age matched referents  
22  
23 11 (based on % of predicted adult stature) relative to UK 1990 reference growth charts. For  
24  
25 12 both approaches, children were classified as a normal weight if >2<sup>nd</sup> centile and <85<sup>th</sup> centile,  
26  
27 13 overweight if 85<sup>th</sup> and <95<sup>th</sup> centiles, and obese if ≥95<sup>th</sup> centile.

28  
29 14 **Results** Fifty-one children (12.5%) were overweight, and a further 51 obese (12.5%)  
30  
31 15 according to standard chronological-age matched classifications. Adjustment for maturity  
32  
33 16 resulted in 32% of overweight girls, and 15% of overweight boys being reclassified as a  
34  
35 17 normal weight, and 11% and 8% of obese girls and boys respectively being reclassified as  
36  
37 18 overweight. Early maturing children were 4.9 times more likely to be reclassified from  
38  
39 19 overweight to normal weight than 'on-time' maturers (odds ratio 95% CI=1.3 to 19).

40  
41 20 **Conclusions:** Incorporating assessments of maturational status into weight classification  
42  
43 21 resulted in significant changes to the classification of early-maturing adolescents. Further  
44  
45 22 research exploring the implications for objective health risk and wellbeing is needed.  
46  
47

48 23  
49  
50  
51  
52  
53  
54  
55  
56  
57  
58  
59  
60

1  
2  
3  
4  
5  
6  
7  
8  
9  
10  
11  
12  
13  
14  
15  
16  
17  
18  
19  
20  
21  
22  
23  
24  
25  
26  
27  
28  
29  
30  
31  
32  
33  
34  
35  
36  
37  
38  
39  
40  
41  
42  
43  
44  
45  
46  
47  
48  
49  
50  
51  
52  
53  
54  
55  
56  
57  
58  
59  
60

1 **ARTICLE SUMMARY**

2 **Strengths and Limitations of this study**

- 3       • The analyses are based on objective height and weight measurements of 407  
4       children taken by trained researchers implementing a rigorous standardised protocol.
- 5       • The approach is the first to demonstrate a simple and readily replicable means of  
6       exploring or adjusting for the impact of maturity timing on weight categorisation  
7       during late childhood /early adolescence.
- 8       • Although the sample was representative of the diversity of children in one  
9       geographical area of the UK, the data are not nationally representative and ethnic  
10      minority groups are particularly under-represented.

11  
12

For peer review only

## 1 INTRODUCTION

2 Childhood obesity is consistently linked to a greater risk of obesity in adulthood and the  
3 consequent increased risk to health through conditions such as diabetes, cardiovascular  
4 disease, and certain forms of cancer.[1] As a means of identifying children at elevated risk,  
5 the classification of children's weight status is widely practised by physicians and public  
6 health teams in many countries.[2-4] Yet, parents' recognition of when a child is overweight  
7 can be as low as 25%.[5] This is in part exacerbated by the normalisation of being  
8 overweight, with approximately 33% of UK 10-11 year olds now being classified as  
9 overweight or obese. Schemes such as England's National Child Measurement Programme  
10 (NCMP), through which over 95% of 4-5 and 10-11 year old children are weighed each  
11 year,[6] provide excellent data for monitoring population-level obesity. However, the NCMP  
12 has also been used to provide objective feedback to parents on their child's weight status  
13 with a view to improving awareness and engaging families with weight management  
14 services. To date however, providing NCMP data as feedback has resulted in little uptake of  
15 weight management support,[7] and may have alienated many parents who are angry and/or  
16 disbelieving of the information provided.[7-9]

17 Research investigating the source of parental anger and rejection of the weighing  
18 and measuring of children highlights that many parents fear that the risk of harm to their  
19 child's health and wellbeing is greater from *labelling* them as overweight (e.g., in  
20 undermining self-esteem and triggering eating disorder symptomology and poor self-esteem)  
21 than it is from *being* overweight.[7-11] In the absence of conclusive evidence that this is not  
22 the case, and given that strong negative associations between parent-child weight talk and  
23 well-being have been reported,[12] health professionals have a responsibility to ensure that  
24 any intervention that could incur such risks is based on accurate information and does not  
25 target those for whom it may not be necessary.

26 A primary reason that parents offer for being distrusting of the information provided  
27 about their child's weight status is that such judgements fail to account for individual

1  
2  
3 1 differences. In particular, parents argue that when children approach puberty, judgements of  
4  
5 2 their weight status that do not take account of relative differences in pubertal development  
6  
7 3 are not valid.[8] While there is reliable evidence that earlier puberty is associated with a  
8  
9 4 greater risk of obesity, and thus that the two may be somewhat conflated,[13] researchers  
10  
11 5 have also raised the question of whether it is appropriate to judge weight status based on  
12  
13 6 BMI during puberty when some increase in body fat is normal and healthy.[14,15] The use of  
14  
15 7 BMI for establishing weight status in relation to health risk in children is certainly problematic,  
16  
17 8 especially during the period of peak growth velocity (average onset 11.8 years in girls, and  
18  
19 9 14.0 years in boys)[16] when height (and therefore the weight to height ratio on which the  
20  
21 10 BMI is based) is liable to considerable change. Past work using Dual Energy X-ray  
22  
23 11 Absorption scans to provide accurate assessments of body fat demonstrate a considerable  
24  
25 12 normative increase in fat mass around the trunk in both boys and girls in the lead up to the  
26  
27 13 period of peak height velocity (i.e., the main event referred to as 'puberty') regardless of  
28  
29 14 physical activity and dietary fat intake.[17,18] Yet, these studies have not used data to adjust  
30  
31 15 estimates of a child's weight status according to their maturity status.

32  
33  
34 16 There is currently no research reporting on the effect that adjustment for pubertal  
35  
36 17 status could have on population estimates of obesity, or of how we could adjust the  
37  
38 18 classification of risk for children who are advanced in maturity through acceptable, non-  
39  
40 19 invasive means. Despite this lack of work, it would be possible to do so within a practice  
41  
42 20 setting via using non-invasive means of estimating children's maturity status that are  
43  
44 21 currently available. Accordingly, the aim of this study is to investigate the degree to which  
45  
46 22 the weight categorisation of a cohort of UK 9-11 year old children differs when estimated  
47  
48 23 through comparison of their BMI against chronological age- and sex-matched UK BMI  
49  
50 24 reference charts (standard UK practice), versus when estimated using reference charts  
51  
52 25 matched to their biological (i.e., maturity adjusted) age. This analysis is undertaken with a  
53  
54 26 view to providing a means of adjusting for expected maturity-related increases in body fat  
55  
56 27 mass among children and adolescents to provide more accurate estimates of obesity  
57  
58  
59  
60

1 prevalence. The process of generating more tailored estimates of weight status may also  
2 help to engage parents in discussions about a healthy weight for their child and has the  
3 potential to increase acceptance that a child is overweight.

## 4 **METHODS**

### 5 **Participants**

6 Participants were 407 9-11 year old children who formed the UK sample of the International  
7 Study of Childhood Obesity, Lifestyle and the Environment (ISCOLE).[19] Participants were  
8 recruited from 26 primary schools in south west England. Schools were stratified according  
9 to pupils socio-economic status (SES; based on levels of entitlement to free school meals;  
10 high, mid, low) of the catchment area and weighted by size (large, small), and then  
11 approached sequentially to maximise the diversity of the sample of participating children. All  
12 Year 6 children in participating schools were eligible to take part. The analytical sample  
13 used in this study showed little ethnic diversity, 98% were white British, compared with 90-  
14 97% in the local authorities where data were collected, and 87% nationally.

### 15 **Procedure**

16 Detailed information of the standardised data collection protocol is published elsewhere.[19]  
17 Written consent for the study was obtained from head teachers and parents, and assent  
18 provided by children prior to participation. A battery of anthropometric measurements were  
19 taken by staff trained in the ISCOLE protocol. Standing height was measured to the nearest  
20 0.1 cm without shoes with the participant's head in the Frankfort Plane and at the end of a  
21 deep inhalation using a Seca 213 portable stadiometer (Hamburg, Germany). Body mass  
22 was measured to the nearest 0.1 kg using a portable Tanita SC- 240 Body Composition  
23 Analyzer (Arlington Heights, IL). For both height and weight, two measurements were taken  
24 and the mean of the two scores used in subsequent analysis. If the two values differed by  
25 more than 0.5 cm for height, or 0.5 kg for weight, a third measure was taken, and the  
26 average of the closest two retained in the analysis. Subsequently, Body Mass Index (BMI;  
27 body mass (kg)/height (m<sup>2</sup>)) was calculated. Overarching ethical approval for the ISCOLE

1  
2  
3 1 protocol was provided by the Pennington Biomedical Research Center Institutional Review  
4  
5 2 Board, and local ethical approval was also obtained for the UK site by the institutional  
6  
7 3 research ethics committee. Data were entered into a secure central web-based  
8  
9 4 management system, audited by the ISCOLE coordinating centre.

10  
11  
12 5 Classification of maturity and weight status. Maturity status was calculated by a non-  
13  
14 6 invasive means (i.e., the Khamis-Roche method),[20] based on the percentage of predicted  
15  
16 7 adult stature that a child had attained at measurement. This method holds that among youth  
17  
18 8 of the same age, individuals who are closer to their mature (i.e., adult) stature are more  
19  
20 9 advanced in biological maturity. A boy of 12 years who has attained 90% of predicted adult  
21  
22 10 height, for example, would be considered more mature than a boy, of the same age and  
23  
24 11 height, who had obtained 80% predicted adult height. The Khamis-Roche method predicts  
25  
26 12 adult height from the child's age, height, and weight, and mid-height of the biological  
27  
28 13 parents. Self-reported parent heights were adjusted for over-estimation using equations  
29  
30 14 generated from over 1000 measured and self-estimated heights from adults.[21] The  
31  
32 15 Khamis-Roche method has been validated against skeletal age in American youth[22] and  
33  
34 16 has also been applied in studies of British youth.[23-25] The median error bounds (i.e. the  
35  
36 17 confidence interval within which 50% of the cases for true height will fall) between actual and  
37  
38 18 predicted adult stature between the ages of 9 to 12 fall between 2.0 and 2.5 cm in boys, and  
39  
40 19 1.9 and 2.1 cm in girls, respectively.[20]

41  
42  
43 20 Maturity status was calculated using z-scores for the percentage of mature height  
44  
45 21 achieved: for group comparisons, z-scores between -1.0 and + 1.0 were considered 'on  
46  
47 22 time', z-scores below -1.0 'late maturers', and z-scores above 1.0, 'early maturers'.[26] To  
48  
49 23 obtain an estimate of biological age, percentage of adult stature was compared with age and  
50  
51 24 sex specific reference standards generated from the UK 1990 growth reference data.[27]  
52  
53 25 Reference standards for percentage of adult stature attained were calculated at intervals of  
54  
55 26 0.1 years for each sex. Percentages were based upon mean values for stature attained at  
56  
57 27 each age interval, and the mean values for stature attained at and above 18 years of age  
58  
59  
60



1 (177.6 cm in males; 163.7 cm in females). For example, a girl of 10.5 years who had attained 91.5% of predicted adult stature would have presented a value equivalent to the mean percentage of adult stature attained by UK girls aged 12.0 years. Accordingly, she would be assigned a maturational (biological) age of 12.0 years. For both standard and adjusted calculations of weight status, and in line with the threshold used for population assessment using NCMP data by Public Health England in 2016,[28] overweight and obesity was judged through reference to the UK1990 BMI reference data.[29] Children with a BMI  $\geq$  the 85<sup>th</sup> centile and <95<sup>th</sup> centile were classified as overweight, and children over the 95<sup>th</sup> centile as obese. The difference between the two classification systems (i.e., standard, and maturity adjusted) stemmed from the reference curve against which the child's BMI was compared. To calculate standard classifications, children were matched to the reference curve appropriate to their sex and chronological age in months.

### 13 **Analysis**

14 We examined whether the classification of weight differed significantly when using standard versus adjusted BMI centiles using chi-square tests, and explored whether there were differences in the number of children reclassified according to sex or maturity status using ANOVA. Effect sizes were also computed to provide an indication of the meaningfulness of statistical differences;  $\eta^2$  indicates the effect size of F statistics in ANOVA; values  $\geq 0.022$  are considered a small but meaningful effect,  $\geq 0.059$  a moderate effect and 0.14 and upwards a large effect.[30] Cohen's d for 2-way comparisons ( $\geq 0.2$  and  $\leq 0.5$  considered a small effect,  $\geq 0.5$  and  $\leq 0.8$  a moderate effect, and  $\geq 0.8$  a large effect). Odds ratios of the probability of change in classification were calculated for early, on-time, and late maturers.

### 23 **RESULTS**

24 The sample comprised 407 children (78% of the 525 involved in the study; 223 girls (55%), 25 Mean age 10.9 years, SD=0.5, range 9.3 -11.8) whose height and weight were objectively 26 measured and whose biological parents self-reported their own heights. Average BMI was 27 18.3 (SD=3.0), and according to usual age and sex matched cut-offs, 51 (12.5%) children

1  
2  
3 1 were classified as overweight, and a further 51 (12.5%) obese. Slightly more girls than boys  
4  
5 2 were overweight or obese (26% versus 24%, respectively). No children were underweight  
6  
7 3 (BMI < 2<sup>nd</sup> centile). On average, girls had reached a more advanced stage of maturity than  
8  
9 4 boys (girls averaged 88% expected adult height, vs 81% for boys). Five percent of boys and  
10  
11 5 9% of girls were late maturers, 71% of boys and 61% of girls on-time, and 24% of boys and  
12  
13 6 30% of girls were early maturers.  
14

15  
16  
17 8 The results of a 2-way (gender and weight status) ANOVA indicated that there was a  
18  
19 9 significant difference in biological maturity across weight categories ( $F(2,401)=38$ ,  $p<0.001$ ;  
20  
21 10  $\eta^2=0.16$ ), gender ( $F(1,401)=422$ ,  $p<0.001$ ;  $\eta^2=0.51$ ), and a significant interaction term  
22  
23 11 ( $F(2,401)=5.5$ ,  $p=0.005$ ;  $\eta^2=0.03$ ). The data show a trend for girls to be more biologically  
24  
25 12 mature than boys at this age, for biological maturity to be more advanced in higher weight  
26  
27 13 categories, and for the difference in biological maturity between weight categories to be  
28  
29 14 more pronounced in girls (Figure 1).  
30  
31

32 15 Figure 1: Trends in maturation status across weight categorisation  
33  
34 16 <Figure 1 here>  
35

### 36 17 **Comparisons with adjusted values**

37  
38 18 For the sample as a whole, the mean difference between chronological age and biological  
39  
40 19 age (i.e., age for the given percentage of expected adult height achieved) was 0.18 years  
41  
42 20 (SD = 0.6), ranging from a delay of 1.67 years, to being advanced by 5.5 years. This latter  
43  
44 21 value refers to a girl with a height of 166cm, who had reached 99.9% of her predicted adult  
45  
46 22 height; her weight status did not change when adjusting for developmental stage (she was  
47  
48 23 classified as obese using both systems).  
49

50  
51 24 When BMI centile was adjusted for maturation, there was a small decrease in the  
52  
53 25 proportion of children classified as overweight (from 12.5 to 10.6%), and obese (from 12.5%  
54  
55 26 to 11.8%). This related to a small but significant decrease in the mean estimated BMI centile  
56  
57 27 within the sample; standard vs adjusted calculation Mean BMI = 58.2 (SD=30.1) vs 57.4  
58  
59  
60

(SD=28.8) ( $t(406)=3.09$ ,  $p=.002$ ;  $d=0.02$ ). Overall, 5 (11%) overweight or obese boys, and 13 (22%) of overweight or obese girls were reclassified into a lower weight category (Chi square = 583,  $p<0.001$ , Table 1). Only one boy and three girls were reclassified into a higher weight category.

Of the 111 children judged to be early maturers, 59% were classified as a healthy weight using standard chronological age growth reference charts (19% overweight, and 23% obese), compared with 67% following adjustment for maturity (13% overweight and 21% obese). Overweight early maturers (i.e., those we consider most important to 'get right' on the basis of requiring intervention or not) were 4.9 times more likely to be reclassified as a normal weight following maturity adjustment than their overweight on-time peers (43% vs 13%; odds ratio = 4.9; 95% CI 1.25 to 19). There was no apparent difference for obese children reclassified as overweight (8% vs 12%; odds ratio = 0.67, 95% CI: 0.10 to 4.4).

Table 1: Comparison of weight classifications following BMI centile adjustment

| Standard centiles | Adjusted centiles                  |                    |               | Total N |
|-------------------|------------------------------------|--------------------|---------------|---------|
|                   | Healthy weight<br>n(%)             | Overweight<br>n(%) | Obese<br>n(%) |         |
| Boys              | Chi-square (df=4) = 299, $p<0.001$ |                    |               |         |
| Healthy weight    | 139 (>99)                          | 1 (<1)             | 0             | 142     |
| Overweight        | 3 (15)                             | 17 (85)            | 0             | 20      |
| Obese             | 0                                  | 2(8)               | 22 (92)       | 24      |
| Girls             | Chi-square (df=4) = 290, $p<0.001$ |                    |               |         |
| Healthy weight    | 164 (>99)                          | 1 (<1)             | 0             | 165     |
| Overweight        | 10 (32)                            | 19 (61)            | 2 (7)         | 31      |
| Obese             | 0                                  | 3 (11)             | 24 (89)       | 27      |

16

## 1 DISCUSSION

2 A comparison of the weight status categorisation of a sample of 9-11 year old UK children  
3 according to standard chronological age versus biological age growth charts resulted in the  
4 downward-classification of 18% of overweight and obese children, representing 22% of  
5 overweight girls and 11% of overweight boys. Only four children (1%) were reclassified into a  
6 higher weight category. This effect was more pronounced in girls, for whom almost one in  
7 three girls who were reported to be overweight would not have been classified as such using  
8 a maturity-adjusted approach. Given the limited age range of the sample, and that boys  
9 mature on average two years later than girls, the effect may reach a similar extent for boys  
10 but at a later age.

11 Within this study, we attempted to quantify the difference that adjusting judgements  
12 of weight status by a child's level of maturity could have on both population estimates of  
13 childhood overweight and obesity, and on the treatment of individual children and families.  
14 The strengths of work reside with basing the analysis on a broad cohort of children using  
15 robust objective measurement protocols at an age when the effects of puberty are first  
16 starting to emerge, and importantly at the age when weight measurement by health  
17 professionals takes place and the lack of consideration for maturity is known to be a source  
18 of tension between parents and health services. A limitation of this study is that the original  
19 UK 1990 dataset bases the norms on which the BMI centiles that we (and health services)  
20 use include children of all maturity levels, not only on-time maturers. However, it is likely  
21 that the differences observed in our analyses would have been greater, rather than smaller,  
22 if the reference data had also standardised for maturity status (i.e., if off-time maturers could  
23 be removed). We also note that children from ethnic minorities were under-represented in  
24 our sample.

25 BMI is acknowledged to be a useful but imperfect proxy indicator of fat mass (and  
26 excess fat mass) and subsequent health risk.[31-33] Past work has explored how  
27 moderating factors such as sex, race and ethnicity may influence the accuracy of BMI in

1  
2  
3 1 predicting health risk,[34,35] however whereas the impact of puberty on BMI at a given  
4  
5 2 chronological age is well established, few studies have attempted to quantify the impact of  
6  
7 3 biological maturity has on the accuracy of weight classifications.[36] A sensitivity and  
8  
9 4 specificity analysis of BMI in classifying obesity (as measured by body fat mass established  
10  
11 5 through DXA scans, establishing puberty through tanner scales) in adolescents of all ages in  
12  
13 6 New Zealand reported 6-12% of misclassification [36]. Nonetheless, the present study is the  
14  
15 7 first to demonstrate how weight classification may account for children's maturity status in  
16  
17 8 addition to age and sex when benchmarking BMI against growth reference charts, and to  
18  
19 9 report on the likely effects (in terms of changes to weight classifications) of doing so. As the  
20  
21 10 healthy range for BMI increases with age up to adulthood as a reflection of expected healthy  
22  
23 11 increases in body fat during puberty, it is likely that early maturing children and adolescents  
24  
25 12 can be a normal or healthy weight at a higher BMI than their later maturing peers: however,  
26  
27 13 research specifically mapping maturity-adjusted weight categorisation to health risk is  
28  
29 14 needed to formally test this hypothesis.

31  
32 15 These findings post two key implications for practice. First, they raise the question of  
33  
34 16 whether we should adjust for maturity when judging whether children or adolescents are  
35  
36 17 overweight. Given the lack of evidence that weight monitoring (as undertaken through the  
37  
38 18 NCMP and similar programmes) results in positive effects on children's health and health  
39  
40 19 behaviours,[7,37] and some evidence that such monitoring activities could undermine their  
41  
42 20 wellbeing and self-concept,[8,9] there seems little risk that adjusting for biological maturity  
43  
44 21 will result in harm (i.e., children are not identified, and do not receive effective help).  
45  
46 22 Whereas the practice could be of benefit if we are better able to raise awareness and  
47  
48 23 engage with parents whose children remain classified as overweight or obese following  
49  
50 24 adjustment as a result of showing that we have tailored the judgement to their child's level of  
51  
52 25 biological maturity. Second, the findings suggest that early maturing children are particularly  
53  
54 26 at risk of misclassification; this group are already known to be at greater risk of poor mental  
55  
56 27 health[38-40] and may be particularly susceptible to the negative impact of such evaluations  
57  
58  
59  
60

1  
2  
3  
4  
5  
6  
7  
8  
9  
10  
11  
12  
13  
14  
15  
16  
17  
18  
19  
20  
21  
22  
23  
24  
25  
26  
27  
28  
29  
30  
31  
32  
33  
34  
35  
36  
37  
38  
39  
40  
41  
42  
43  
44  
45  
46  
47  
48  
49  
50  
51  
52  
53  
54  
55  
56  
57  
58  
59  
60

1 as they generally hold more negative perceptions of the physical self (lower perceptions of  
2 attractiveness, sports competence, and fitness.[41] As such, early maturing children and  
3 adolescents represent a vulnerable group with whom we should be particularly careful to  
4 minimise the potential unintended negative consequences of health policies.

5  
6

For peer review only

1  
2  
3 **1 REFERENCES**  
4

- 5  
6 1. Park MH, Falconer C, Viner RM, Kinra S. The impact of childhood obesity on morbidity  
7  
8 and mortality in adulthood: a systematic review. *Obesity Reviews*. 2012;13(11):985-  
9  
10 1000.  
11  
12 2. NHS Digital. National Child Measurement Programme [cited 2016 Dec 15] Available  
13  
14 from: <http://content.digital.nhs.uk/NCMP>  
15  
16 3. Wieske RC, Nijhuis MG, Carmiggelt BC, Wagenaar-Fischer MM, Boere-Boonekamp  
17  
18 MM. Preventive youth health care in 11 European countries: an exploratory analysis.  
19  
20 *International Journal of Public Health*. 2012;57(3):637-41.  
21  
22 4. Roberto C, Soo J, Pomeranz L. Regulatory strategies for preventing obesity and  
23  
24 improving public health. *Managing and Preventing Obesity: Behavioural Factors and*  
25  
26 *Dietary Interventions*. 2014:277.  
27  
28 5. Tompkins CL, Seablom M, Brock DW. Parental Perception of Child's Body Weight: A  
29  
30 Systematic Review. *Journal of Child and Family Studies*. 2015;24(5):1384-91.  
31  
32 6. NHS Digital. National Child Measurement Programme: England, 2015/16 school year  
33  
34 Data Quality Statement. 2016 Nov 3 [cited 2016 Dec 15] Available from:  
35  
36 [http://content.digital.nhs.uk/catalogue/PUB22269/nati-chil-meas-prog-eng-2015-2016-](http://content.digital.nhs.uk/catalogue/PUB22269/nati-chil-meas-prog-eng-2015-2016-qual.pdf)  
37  
38 [qual.pdf](http://content.digital.nhs.uk/catalogue/PUB22269/nati-chil-meas-prog-eng-2015-2016-qual.pdf)  
39  
40 7. Falconer CL, Park MH, Coker H, Skow A, Black J, Saxena S, et al. The benefits and  
41  
42 harms of providing parents with weight feedback as part of the national child  
43  
44 measurement programme: a prospective cohort study. *BMC Public Health*. 2014;14:549.  
45  
46 8. Gillison F, Beck F, Lewitt J. Exploring the basis for parents' negative reactions to being  
47  
48 informed that their child is overweight. *Public Health Nutrition*. 2014;17(5):987-97.  
49  
50 9. Grimmett C, Croker H, Carnell S, Wardle J. Telling parents their child's weight status:  
51  
52 psychological impact of a weight-screening program. *Pediatrics*. 2008;122(3):e682-8.  
53  
54 10. Syrad H, Falconer C, Cooke L, Saxena S, Kessel A, Viner R, et al. Health and  
55  
56 happiness is more important than weight': a qualitative investigation of the views of  
57  
58  
59  
60

- 1  
2  
3 1 parents receiving written feedback on their child's weight as part of the National Child  
4  
5 2 Measurement Programme. *Journal of Human Nutrition and Dietetics*. 2014; 28(1):47-55.  
6  
7 3 11. Borra ST, Kelly L, Shirreffs MB, Neville K, Geiger CJ. Developing health messages:  
8  
9 4 qualitative studies with children, parents, and teachers help identify communications  
10  
11 5 opportunities for healthful lifestyles and the prevention of obesity. *Journal of the*  
12  
13 6 *American Dietetic Association*. 2003;103(6):721-8.  
14  
15 7 12. Gillison F, Lorenc A, Sleddens E, Williams S, Atkinson L. Can it be harmful for parents  
16  
17 8 to talk to their child about their weight? A meta-analysis. *Preventive Medicine*. 2016;  
18  
19 9 93:135-46.  
20  
21 10 13. Prentice P, Viner RM. Pubertal timing and adult obesity and cardiometabolic risk in  
22  
23 11 women and men: a systematic review and meta-analysis. *International Journal of*  
24  
25 12 *Obesity*. 2013;37(8):1036-43.  
26  
27 13 14. O'Dea J & Abraham S. Should body mass index be used in adolescents? *Lancet*. 1995;  
28  
29 14 345:657.  
30  
31 15 15. Bini V, Celi F, Berioli MG, Bacosi ML, Stella P, Giglio P, Tosti L & Falorni A. Body mass  
32  
33 16 index in children and adolescents according to age and pubertal stage. *European*  
34  
35 17 *Journal of Clinical Nutrition*. 2000;54:214.  
36  
37 18 16. Malina RM, Bouchard C, Bar-Or O. Growth, maturation, and physical activity. *Human*  
38  
39 19 *Kinetics*; 2004.  
40  
41 20 17. Sherar LB, Esliger DW, Baxter-Jones AD, Tremblay MS. Age and gender differences in  
42  
43 21 youth physical activity: does physical maturity matter? *Medicine and Science in Sports*  
44  
45 22 *and Exercise*. 2007;39(5):830.  
46  
47 23 18. Sherar LB, Eisenmann JC, Chilibeck PD, Muhajarine N, Martin S, Bailey DA, et al.  
48  
49 24 Relationship between trajectories of trunk fat mass development in adolescence and  
50  
51 25 cardiometabolic risk in young adulthood. *Obesity*. 2011;19(8):1699-706.  
52  
53 26 19. Katzmarzyk PT, Barreira TV, Broyles ST, Champagne CM, Chaput JP, Fogelholm M, et  
54  
55 27 al. The International Study of Childhood Obesity, Lifestyle and the Environment  
56  
57 28 (ISCOLE): design and methods. *BMC Public Health*. 2013;13:900.



- 1  
2  
3 1 20. Khamis HJ, Roche AF. Predicting adult stature without using skeletal age: the Khamis-  
4 Roche method. *Pediatrics*. 1994;94(4):504-7.  
5  
6  
7 3 21. Epstein LH, Valoski AM, Kalarchian MA, McCurley J. Do children lose and maintain  
8 weight easier than adults: a comparison of child and parent weight changes from six  
9 months to ten years. *Obesity Research*. 1995;3(5):411-7.  
10  
11  
12 6 22. Malina RM, Dompier TP, Powell JW, Barron MJ, Moore MT. Validation of a noninvasive  
13 maturity estimate relative to skeletal age in youth football players. *Clinical Journal of*  
14 *Sport Medicine*. 2007;17(5):362-8.  
15  
16  
17 9 23. Cumming SP, Standage M, Gillison F, Malina RM. Sex differences in exercise behavior  
18 during adolescence: is biological maturation a confounding factor? *Journal of*  
19 *Adolescent Health*. 2008;42(5):480-5.  
20  
21  
22 12 24. Cumming SP, Standage M, Loney T, Gammon C, Neville H, Sherar LB, et al. The  
23 mediating role of physical self-concept on relations between biological maturity status  
24 and physical activity in adolescent females. *Journal of Adolescence*. 2011;34(3):465-73.  
25  
26  
27 15 25. Hunter Smart JE, Cumming SP, Sherar LB, Standage M, Neville H, Malina RM. Maturity  
28 associated variance in physical activity and health-related quality of life in adolescent  
29 females. A mediated effects model. *Journal of Physical Activity & Health*. 2012;9(1):86-  
30 95.  
31  
32  
33 19 26. Malina RM, Cumming SP, Morano PJ, Barron M, Miller SJ. Maturity status of youth  
34 football players: a noninvasive estimate. *Medicine & Science in Sports & Exercise*.  
35 2005;37(6):1044-52.  
36  
37  
38 22 27. Freeman J, Cole T, Chinn S, Jones P, White E, Preece M. Cross sectional stature and  
39 weight reference curves for the UK, 1990. *Archives of Disease in Childhood*.  
40 1995;73(1):17-24.  
41  
42  
43 25 28. Public Health England [internet] 2016. Measuring and interpreting BMI in Children [cited  
44 2016 Dec 15]. Available from:  
45  
46  
47  
48  
49  
50  
51  
52  
53  
54  
55  
56  
57  
58  
59  
60

- 1  
2  
3 1 29. Cole TJ, Freeman JV, Preece MA. Body mass index reference curves for the UK, 1990.  
4  
5 2 Archives of Disease in Childhood. 1995;73(1):25-9.  
6  
7 3 30. Fritz CO, Morris PE, Richler JJ. Effect size estimates: current use, calculations, and  
8  
9 4 interpretation. Journal of Experimental Psychology. 2012;141(1):2.  
10  
11 5 31. Freedman DS, Mei Z, Srinivasan SR, Berenson GS, Dietz WH. Cardiovascular risk  
12  
13 6 factors and excess adiposity among overweight children and adolescents: the Bogalusa  
14  
15 7 Heart Study. Journal of Pediatrics. 2007;150(1):12-7. e2.  
16  
17 8 32. Freedman DS, Sherry B. The validity of BMI as an indicator of body fatness and risk  
18  
19 9 among children. Pediatrics. 2009;124(Supplement 1):S23-S34.  
20  
21 10 33. Mei Z, Grummer-Strawn LM, Pietrobelli A, Goulding A, Goran MI, Dietz WH. Validity of  
22  
23 11 body mass index compared with other body-composition screening indexes for the  
24  
25 12 assessment of body fatness in children and adolescents. The American Journal of  
26  
27 13 Clinical Nutrition. 2002;75(6):978-85.  
28  
29 14 34. Duncan JS, Duncan EK, Schofield G. Accuracy of body mass index (BMI) thresholds for  
30  
31 15 predicting excess body fat in girls from five ethnicities. Asia Pacific Journal of Clinical  
32  
33 16 Nutrition. 2009;18(3):404-11.  
34  
35 17 35. Zimmermann MB, Gubeli C, Puntener C, Molinari L. Detection of overweight and obesity  
36  
37 18 in a national sample of 6-12-y-old Swiss children: accuracy and validity of reference  
38  
39 19 values for body mass index from the US Centers for Disease Control and Prevention  
40  
41 20 and the International Obesity Task Force. American Journal of Clinical Nutrition.  
42  
43 21 2004;79(5):838-43.  
44  
45 22 36. Taylor RW, Falorni A, Jones IE, Goulding A. Identifying adolescents with high  
46  
47 23 percentage body fat: a comparison of BMI cutoffs using age and stage of pubertal  
48  
49 24 development compared with BMI cutoffs using age alone. European Journal of Clinical  
50  
51 25 Nutrition. 2003;57(6):764-769  
52  
53 26 37. Nihiser AJ, Lee SM, Wechsler H, McKenna M, Odom E, Reinold C, et al. BMI  
54  
55 27 measurement in schools. Pediatrics. 2009;124(Supplement 1):S89-S97.  
56  
57  
58  
59  
60

- 1  
2  
3 1 38. Niven A, Fawkner S, Knowles A-M, Stephenson C. Maturational differences in physical  
4 self-perceptions and the relationship with physical activity in early adolescent girls.  
5 2  
6 Pediatric Exercise Science. 2007;19(4):472-80.  
7 3  
8  
9 4 39. Kaltiala-Heino R, Marttunen M, Rantanen P, Rimpelä M. Early puberty is associated  
10 with mental health problems in middle adolescence. Social Science & Medicine.  
11 5  
12 2003;57(6):1055-64.  
13 6  
14  
15 7 40. Laitinen-Krispijn S, Ende J, Hazebroek-Kampschreur A, Verhulst F. Pubertal maturation  
16 and the development of behavioural and emotional problems in early adolescence. Acta  
17 8  
18 Psychiatrica Scandinavica. 1999;99(1):16-25.  
19 9  
20  
21 10 41. Cumming SP, Sherar LB, Smart JEH, Rodrigues AM, Standage M, Gillison FB, et al.  
22 Physical activity, physical self-concept, and health-related quality of life of extreme early  
23 11  
24 and late maturing adolescent girls. Journal of Early Adolescence. 2012;32(2):269-92.  
25 12  
26  
27 13  
28  
29  
30 14  
31  
32  
33  
34  
35  
36  
37  
38  
39  
40  
41  
42  
43  
44  
45  
46  
47  
48  
49  
50  
51  
52  
53  
54  
55  
56  
57  
58  
59  
60

1  
2  
3  
4  
5  
6  
7  
8  
9  
10  
11  
12  
13  
14  
15  
16  
17  
18  
19  
20  
21  
22  
23  
24  
25  
26  
27  
28  
29  
30  
31  
32  
33  
34  
35  
36  
37  
38  
39  
40  
41  
42  
43  
44  
45  
46  
47  
48  
49  
50  
51  
52  
53  
54  
55  
56  
57  
58  
59  
60

1 Competing interests:

2 None to declare

3

4 Funding

5 The ISCOLE study on which this paper is based was funded by The Coca-Cola Company.  
6 All authors except for CB were recipients of this grant. The funder had no role in study  
7 design, data collection and analysis, decision to publish, or preparation of the manuscript. All  
8 researchers were independent of the funders in all aspects of their research.

9 Details of contributors

10

11 Fiona Gillison led in the drafting of the paper, development of the idea for the use of the  
12 ISCOLE data in this way (with SC), conduct of analyses (with CB). She was a CI for the UK  
13 ISCOLE site, involved with data collection, researcher training and quality oversight.

14 Sean Cumming provided expertise in the assessment of maturity and interpretation of  
15 findings, contributed to the development of the concept for using the ISCOLE data in this  
16 way (with FG), and contributed to the drafting of the paper. He was involved with data  
17 collection and coordination for the UK ISCOLE site.

18 Martyn Standage is the PI of the UK ISCOLE study site, and contributed to the drafting of the  
19 paper.

20 Catherine Barnaby provided input and expertise to the analysis of the study data and  
21 contributed to the drafting of the paper.

22 Peter Katzmarzyk is the PI of ISCOLE across the 12-country sites, responsible for the  
23 design of the original study and oversight of data collection and analysis, and contributed to  
24 drafting the paper.

25 We confirm that all authors had access to all of the data and can take responsibility for the  
26 integrity of the data and accuracy of the data analysis.

27

28 Data sharing statement

29

30 Data sharing: no additional data available.

31

32 URL to study protocol:

33 <http://bmcpublichealth.biomedcentral.com/articles/10.1186/1471-2458-13-900>

34

35

1  
2  
3  
4  
5  
6  
7  
8  
9  
10  
11  
12  
13  
14  
15  
16  
17  
18  
19  
20  
21  
22  
23  
24  
25  
26  
27  
28  
29  
30  
31  
32  
33  
34  
35  
36  
37  
38  
39  
40  
41  
42  
43  
44  
45  
46  
47  
48  
49  
50  
51  
52  
53  
54  
55  
56  
57  
58  
59  
60

Figure 1: Trends in maturation status across weight categorisation

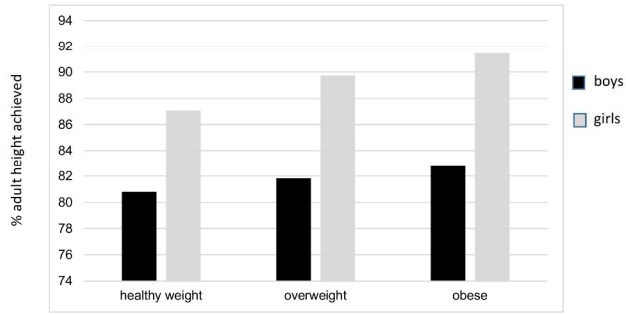

209x296mm (300 x 300 DPI)
